# Supplementary material
Source: PubMed Central journal article supplement (PMC3359124)
Supplement: cc-11-2006-s01.pdf [file cc-11-2006-s01.pdf]

Supplemental Materials to:

Cell Cycle 2012; 11(10): <http://dx.doi.org/10.4161/cc.20423>.

**Huntingtin protein interactions altered by polyglutamine expansion as determined by quantitative proteomic analysis**

Tamara Ratovitski,<sup>1,\*</sup> Ekaterine Chighladze,<sup>1</sup> Nicolas Arbez,<sup>1</sup> Tatiana Boronina,<sup>2</sup> Shelley Herbrich,<sup>3</sup> Robert N. Cole<sup>2</sup> and Christopher A. Ross<sup>1,4,\*</sup>

## **Supplemental figures and tables legends**

**Figure S1.** The IPA network diagram, including Htt, showing proteins related to DNA Metabolism, Energy Production, Neurological Disorder and Cell Cycle, based on the protein data set shown in Table S1 (CV<0.35 between duplicate samples). Proteins identified as 50Q preferential interactors are shown in red; 20Q preferential interactors are shown in green; proteins equally present in both 50Q and 20Q IPs are shown in yellow; Htt is shown in purple; proteins that were not detected by us, but fit into the network are shown in white.

**Figure S2.** Merged two top networks, defined by IPA as most significantly enriched in differential Htt interactors (based on the proteins shown in Table S1), includes proteins related to Gene Expression, RNA post transcriptional modifications and Protein Synthesis. Proteins identified as 50Q preferential interactors are shown in red; 20Q preferential interactors are shown in green; proteins that were not detected by us, but fit into the network are shown in white.

**Table S1. Htt differential interactors.** Proteins identified with median iTRAQ ratios >1.2 or <0.8 between Htt-50Q and Htt-20Q were considered as differential interactors. Only proteins with coefficient of variation (CV) less than 0.35 (calculated from iTRAQ ratios between 2 parallel biological replicates) are shown.

**Table S2. Htt most significant differential interactors.** Proteins most significantly changed in abundance between normal and expanded Htt complexes with ANOVA p-value less than 0.05 are shown





| Description                                                                                       | Accession | observation | MW (kDa) | calc. pI | %coverage | # PSMs | # Peptides | AS: 115/114 | 115-114 mean | 115-114 STDEV | 115-114 CV | AS: 115/114 Count | AS: 116/114 | AS: 116/114 Count | AS: 117/114 | AS: 117/114 Count | 116-117 MEAN | 116-117 STDEV | 116-117 CV |
|---------------------------------------------------------------------------------------------------|-----------|-------------|----------|----------|-----------|--------|------------|-------------|--------------|---------------|------------|-------------------|-------------|-------------------|-------------|-------------------|--------------|---------------|------------|
| thioredoxin-related transmembrane protein 4 precursor [Mus musculus]                              | 112817607 | 2           | 37.1     | 4.37     | 9.25      | 9      | 2          | 1.117       | 1.059        | 0.083         | 0.078      | 5                 | 2.253       | 5                 | 2.175       | 5                 | 2.214        | 0.1           | 0.025      |
| immunity-related GTPase family M protein [Mus musculus]                                           | 6680351   | 2           | 46.5     | 8.28     | 3.91      | 2      | 1          | 0.956       | 0.978        | 0.031         | 0.032      | 1                 | 2.617       | 1                 | 1.796       | 1                 | 2.207        | 0.6           | 0.263      |
| protein CYR61 precursor [Mus musculus]                                                            | 6753594   | 2           | 41.7     | 8.12     | 2.64      | 2      | 1          | 1.298       | 1.149        | 0.211         | 0.183      | 1                 | 1.887       | 1                 | 2.419       | 1                 | 2.153        | 0.4           | 0.175      |
| atlastin-2 isoform 2 [Mus musculus]                                                               | 119372304 | 2           | 46.8     | 5.95     | 3.64      | 3      | 1          | 1.302       | 1.151        | 0.213         | 0.185      | 1                 | 1.917       | 1                 | 1.941       | 1                 | 1.929        | 0.0           | 0.009      |
| receptor-type tyrosine-kinase phosphatase kappa precursor [Mus musculus]                          | 6679561   | 2           | 164.1    | 5.95     | 0.82      | 2      | 1          | 0.880       | 0.940        | 0.085         | 0.090      | 1                 | 1.824       | 1                 | 2.025       | 1                 | 1.925        | 0.1           | 0.074      |
| NADH dehydrogenase [ubiquinone] iron-sulfur protein 2, mitochondrial precursor [Mus musculus]     | 23346461  | 2           | 52.6     | 6.99     | 2.59      | 2      | 1          | 1.184       | 1.092        | 0.130         | 0.119      | 1                 | 1.611       | 1                 | 2.145       | 1                 | 1.878        | 0.4           | 0.201      |
| voltage-dependent anion-selective channel protein 1 [Mus musculus]                                | 6755963   | 2           | 30.7     | 8.54     | 12.37     | 13     | 3          | 1.447       | 1.224        | 0.316         | 0.259      | 2                 | 1.920       | 2                 | 1.762       | 2                 | 1.841        | 0.1           | 0.061      |
| peptidyl-RNA hydrolase 2 [Mus musculus]                                                           | 149363634 | 2           | 19.5     | 7.42     | 19.89     | 18     | 2          | 1.041       | 1.020        | 0.029         | 0.028      | 8                 | 1.571       | 8                 | 2.011       | 8                 | 1.791        | 0.3           | 0.174      |
| mitochondrial import inner membrane translocase subunit TIM50 precursor [Mus musculus]            | 22094989  | 2           | 39.8     | 8.13     | 4.82      | 6      | 1          | 1.139       | 1.069        | 0.098         | 0.092      | 3                 | 1.965       | 3                 | 1.578       | 3                 | 1.771        | 0.3           | 0.154      |
| prolactin regulatory element-binding protein [Mus musculus]                                       | 158749640 | 2           | 45.4     | 8.76     | 11.27     | 6      | 4          | 1.015       | 1.008        | 0.011         | 0.011      | 4                 | 1.403       | 4                 | 2.134       | 4                 | 1.768        | 0.5           | 0.292      |
| ATP-dependent metalloprotease YME1L1 [Mus musculus]                                               | 7305635   | 2           | 80.0     | 8.97     | 2.52      | 2      | 2          | 1.580       | 1.290        | 0.410         | 0.318      | 2                 | 1.470       | 2                 | 1.948       | 2                 | 1.709        | 0.3           | 0.198      |
| 60S ribosomal protein L7-like 1 [Mus musculus]                                                    | 27754134  | 2           | 28.5     | 10.64    | 13.01     | 8      | 3          | 1.358       | 1.179        | 0.253         | 0.215      | 3                 | 2.009       | 3                 | 1.400       | 3                 | 1.704        | 0.4           | 0.253      |
| nuclear valosin-containing protein-like [Mus musculus]                                            | 33468981  | 2           | 94.4     | 6.35     | 5.26      | 17     | 4          | 1.477       | 1.238        | 0.337         | 0.272      | 1                 | 1.405       | 1                 | 1.915       | 1                 | 1.660        | 0.4           | 0.217      |
| E3 ubiquitin-protein ligase UBR5 isoform 2 [Mus musculus]                                         | 163310753 | 2           | 308.1    | 5.83     | 1.00      | 6      | 2          | 1.596       | 1.298        | 0.422         | 0.325      | 3                 | 1.825       | 3                 | 1.457       | 3                 | 1.641        | 0.3           | 0.158      |
| NADH dehydrogenase [ubiquinone] 1 alpha subcomplex subunit 8 [Mus musculus]                       | 21312012  | 2           | 20.0     | 8.46     | 27.91     | 7      | 4          | 1.389       | 1.194        | 0.275         | 0.230      | 6                 | 1.685       | 6                 | 1.567       | 6                 | 1.626        | 0.1           | 0.052      |
| importin-4 [Mus musculus]                                                                         | 19745156  | 2           | 119.2    | 5.03     | 2.87      | 5      | 3          | 1.007       | 1.004        | 0.005         | 0.005      | 3                 | 1.402       | 3                 | 1.835       | 3                 | 1.619        | 0.3           | 0.189      |
| integrin beta-1 precursor [Mus musculus]                                                          | 4504394   | 2           | 88.2     | 5.94     | 4.51      | 5      | 3          | 0.684       | 0.842        | 0.223         | 0.265      | 4                 | 1.645       | 4                 | 1.592       | 4                 | 1.618        | 0.0           | 0.023      |
| vesicle-associated membrane protein-associated protein A [Mus musculus]                           | 94721328  | 2           | 27.8     | 8.40     | 10.04     | 5      | 2          | 1.636       | 1.318        | 0.449         | 0.33       | 3                 | 1.616       | 3                 | 1.544       | 3                 | 1.580        | 0.1           | 0.032      |
| NADH dehydrogenase [ubiquinone] 1 alpha subcomplex assembly factor 4 [Mus musculus]               | 21624617  | 2           | 20.1     | 9.39     | 12.14     | 3      | 2          | 1.395       | 1.198        | 0.280         | 0.233      | 2                 | 1.624       | 2                 | 1.531       | 2                 | 1.577        | 0.1           | 0.042      |
| LAG1 longevity assurance homolog 2 [Mus musculus]                                                 | 22095015  | 2           | 45.0     | 8.75     | 4.21      | 3      | 1          | 0.669       | 0.835        | 0.234         | 0.280      | 1                 | 1.307       | 1                 | 1.845       | 1                 | 1.576        | 0.4           | 0.241      |
| zinc transporter SLC39A7 [Mus musculus]                                                           | 118150668 | 2           | 50.6     | 6.87     | 2.73      | 2      | 1          | 0.848       | 0.924        | 0.108         | 0.117      | 2                 | 1.279       | 2                 | 1.822       | 2                 | 1.551        | 0.4           | 0.248      |
| very long-chain specific acyl-CoA dehydrogenase, mitochondrial precursor [Mus musculus]           | 23956084  | 2           | 70.8     | 8.75     | 3.05      | 1      | 1          | 1.295       | 1.148        | 0.209         | 0.182      | 1                 | 1.483       | 1                 | 1.612       | 1                 | 1.547        | 0.1           | 0.059      |
| serum paraoxonase/arylesterase 2 [Mus musculus]                                                   | 34303979  | 2           | 39.6     | 5.83     | 5.93      | 5      | 2          | 0.722       | 0.861        | 0.197         | 0.228      | 3                 | 1.226       | 3                 | 1.816       | 3                 | 1.521        | 0.4           | 0.274      |
| chitobiosylphosphodolichol beta-mannosyltransferase [Mus musculus]                                | 148277043 | 2           | 54.4     | 8.37     | 5.39      | 5      | 2          | 0.657       | 0.828        | 0.243         | 0.293      | 2                 | 1.232       | 2                 | 1.793       | 2                 | 1.513        | 0.4           | 0.263      |
| oxysterol-binding protein-related protein 1 [Mus musculus]                                        | 52345396  | 2           | 107.7    | 6.44     | 2.95      | 4      | 2          | 1.182       | 1.091        | 0.129         | 0.118      | 2                 | 1.522       | 2                 | 1.502       | 2                 | 1.512        | 0.0           | 0.009      |
| ATPase, Ca++ translocase, slow twitch 2 isoform a [Mus musculus]                                  | 158639579 | 2           | 114.8    | 5.34     | 21.17     | 96     | 23         | 0.897       | 0.949        | 0.073         | 0.075      | 34                | 1.226       | 35                | 1.795       | 35                | 1.511        | 0.4           | 0.266      |
| mitochondrial rho GTPase 1 isoform 1 [Mus musculus]                                               | 31559891  | 2           | 72.2     | 6.49     | 4.44      | 3      | 3          | 0.883       | 0.942        | 0.083         | 0.088      | 2                 | 1.261       | 2                 | 1.757       | 2                 | 1.509        | 0.4           | 0.233      |
| protein unc-84 homolog B [Mus musculus]                                                           | 168693641 | 2           | 78.1     | 6.90     | 3.86      | 4      | 2          | 1.561       | 1.281        | 0.397         | 0.212      | 2                 | 1.584       | 2                 | 1.499       | 2                 | 1.499        | 0.1           | 0.081      |
| vesicle-fusing ATPase [Mus musculus]                                                              | 31543349  | 2           | 82.6     | 6.95     | 3.36      | 4      | 3          | 1.482       | 1.241        | 0.341         | 0.274      | 2                 | 1.669       | 2                 | 1.322       | 2                 | 1.495        | 0.2           | 0.164      |
| mannosyl-oligosaccharide glucosidase [Mus musculus]                                               | 31981106  | 2           | 91.8     | 9.00     | 3.00      | 4      | 2          | 0.905       | 0.952        | 0.067         | 0.07       | 2                 | 1.329       | 2                 | 1.660       | 2                 | 1.494        | 0.2           | 0.157      |
| caprin-1 isoform c [Mus musculus]                                                                 | 162329568 | 2           | 76.6     | 5.12     | 4.34      | 3      | 3          | 1.170       | 1.085        | 0.120         | 0.111      | 3                 | 1.828       | 3                 | 1.142       | 3                 | 1.485        | 0.5           | 0.326      |
| nuclear MIF4G domain-containing protein 1 [Mus musculus]                                          | 134288861 | 2           | 95.9     | 8.87     | 1.64      | 2      | 1          | 1.620       | 1.310        | 0.438         | 0.335      | 2                 | 1.463       | 2                 | 1.501       | 2                 | 1.482        | 0.0           | 0.018      |
| mediator of RNA polymerase II transcription subunit 27 [Mus musculus]                             | 76253678  | 2           | 35.3     | 9.31     | 4.82      | 2      | 1          | 1.612       | 1.306        | 0.433         | 0.331      | 1                 | 1.756       | 1                 | 1.206       | 1                 | 1.481        | 0.4           | 0.263      |
| NADH dehydrogenase [ubiquinone] iron-sulfur protein 7, mitochondrial precursor [Mus musculus]     | 21312950  | 2           | 24.7     | 9.92     | 7.59      | 2      | 2          | 1.532       | 1.266        | 0.376         | 0.297      | 2                 | 1.645       | 2                 | 1.315       | 2                 | 1.480        | 0.2           | 0.158      |
| CTP synthase 1 [Mus musculus]                                                                     | 172072613 | 2           | 66.6     | 6.58     | 14.21     | 17     | 7          | 1.458       | 1.229        | 0.324         | 0.264      | 10                | 1.217       | 10                | 1.698       | 10                | 1.457        | 0.3           | 0.234      |
| nucleoporin NUP188 homolog [Mus musculus]                                                         | 38678526  | 2           | 196.6    | 7.01     | 4.66      | 27     | 9          | 0.835       | 1.167        | 0.237         | 0.103      | 11                | 1.121       | 11                | 1.776       | 11                | 1.449        | 0.5           | 0.319      |
| PREDICTED: similar to nuclear pore-targeting complex component of 58 kDa isoform 1 [Mus musculus] | 149250822 | 2           | 57.9     | 5.68     | 13.04     | 14     | 6          | 1.236       | 1.118        | 0.167         | 0.149      | 6                 | 1.421       | 6                 | 1.465       | 6                 | 1.443        | 0.0           | 0.022      |
| probable RNA-binding protein 19 [Mus musculus]                                                    | 30794154  | 2           | 106.0    | 6.57     | 1.58      | 4      | 1          | 1.473       | 1.236        | 0.334         | 0.270      | 2                 | 1.158       | 2                 | 1.725       | 2                 | 1.442        | 0.4           | 0.278      |
| activator of 90 kDa heat shock protein ATPase homolog 1 [Mus musculus]                            | 22122515  | 2           | 38.1     | 5.53     | 5.62      | 2      | 1          | 1.468       | 1.234        | 0.331         | 0.268      | 1                 | 1.471       | 1                 | 1.403       | 1                 | 1.437        | 0.0           | 0.034      |
| splicing factor 3B subunit 4 [Mus musculus]                                                       | 23346437  | 2           | 44.3     | 8.56     | 4.72      | 4      | 2          | 1.043       | 1.022        | 0.031         | 0.030      | 2                 | 1.477       | 2                 | 1.390       | 2                 | 1.433        | 0.1           | 0.043      |
| PREDICTED: similar to translocin-associated protein alpha, muscle specific [Mus musculus]         | 82950283  | 2           | 31.2     | 4.45     | 2.92      | 3      | 1          | 0.729       | 0.865        | 0.191         | 0.221      | 2                 | 1.200       | 2                 | 1.665       | 2                 | 1.432        | 0.3           | 0.230      |
| integrator complex subunit 1 [Mus musculus]                                                       | 160948597 | 2           | 245.0    | 6.28     | 4.10      | 17     | 6          | 1.422       | 1.211        | 0.299         | 0.197      | 9                 | 1.265       | 9                 | 1.579       | 9                 | 1.422        | 0.2           | 0.156      |
| receptor tyrosine-kinase erbB-2 precursor [Mus musculus]                                          | 54873610  | 2           | 138.5    | 5.97     | 0.88      | 1      | 1          | 1.594       | 1.297        | 0.420         | 0.324      | 1                 | 1.508       | 1                 | 1.335       | 1                 | 1.422        | 0.1           | 0.086      |
| immature colon carcinoma transcript 1 protein [Mus musculus]                                      | 19387848  | 2           | 20.3     | 10.65    | 7.91      | 2      | 1          | 1.591       | 1.295        | 0.418         | 0.323      | 1                 | 1.077       | 1                 | 1.418       | 1                 | 1.418        | 0.5           | 0.340      |
| RIKEN cDNA 2700050L05 isoform 1 [Mus musculus]                                                    | 22122451  | 2           | 66.2     | 7.31     | 2.56      | 10     | 2          | 1.534       | 1.267        | 0.378         | 0.298      | 1                 | 1.485       | 1                 | 1.342       | 1                 | 1.413        | 0.1           | 0.071      |
| thyroid receptor-interacting protein 13 [Mus musculus]                                            | 110625724 | 2           | 48.3     | 5.86     | 8.56      | 8      | 3          | 1.203       | 1.101        | 0.143         | 0.143      | 4                 | 1.062       | 4                 | 1.759       | 4                 | 1.410        | 0.5           | 0.350      |
| heterogeneous nuclear ribonucleoprotein A/B isoform 2 [Mus musculus]                              | 6754222   | 2           | 30.8     | 7.91     | 18.25     | 9      | 4          | 1.309       | 1.154        | 0.218         | 0.189      | 4                 | 1.491       | 4                 | 1.329       | 4                 | 1.410        | 0.1           | 0.081      |
| cytochrome c1, heme protein, mitochondrial [Mus musculus]                                         | 13385006  | 2           | 35.3     | 9.16     | 14.15     | 6      | 3          | 1.374       | 1.187        | 0.265         | 0.223      | 5                 | 1.121       | 5                 | 1.398       | 5                 | 1.281        | 0.4           | 0.281      |
| fatty aldehyde dehydrogenase [Mus musculus]                                                       | 75677435  | 2           | 53.9     | 8.35     | 10.33     | 13     | 5          | 1.817       | 1.099        | 0.129         | 0.142      | 4                 | 1.223       | 4                 | 1.570       | 4                 | 1.397        | 0.2           | 0.176      |
| interferon-stimulated 20 kDa exonuclease-like 2 [Mus musculus]                                    | 29244084  | 2           | 41.0     | 9.98     | 3.53      | 2      | 1          | 0.910       | 1.095        | 0.134         | 0.123      | 1                 | 1.323       | 1                 | 1.469       | 1                 | 1.396        | 0.1           | 0.074      |
| tuffin-interacting protein 11 [Mus musculus]                                                      | 10190660  | 2           | 96.2     | 5.90     | 1.19      | 3      | 1          | 1.604       | 1.302        | 0.427         | 0.328      | 2                 | 1.435       | 2                 | 1.357       | 2                 | 1.396        | 0.1           | 0.039      |
| DNA-directed RNA polymerase 1 subunit RPA43 [Mus musculus]                                        | 27545207  | 2           | 36.7     | 6.21     | 5.76      | 4      | 1          | 1.631       | 1.316        | 0.446         | 0.339      | 2                 | 1.729       | 2                 | 1.062       | 2                 | 1.395        | 0.5           | 0.338      |
| ATPase family AAA domain-containing protein 1 [Mus musculus]                                      | 31560168  | 2           | 40.7     | 6.90     | 6.93      | 11     | 2          | 1.188       | 1.094        | 0.133         | 0.121      | 1                 | 1.075       | 1                 | 1.709       | 1                 | 1.392        | 0.4           | 0.322      |
| ras GTPase-activating protein-binding protein 1 [Mus musculus]                                    | 7305075   | 2           | 51.8     | 5.59     | 6.24      | 2      | 2          | 1.395       | 1.198        | 0.279         | 0.233      | 2                 | 1.455       | 2                 | 1.325       | 2                 | 1.390        | 0.1           | 0.066      |
| ribosome biogenesis protein WDR12 [Mus musculus]                                                  | 10946614  | 2           | 47.3     | 5.60     | 13.00     | 8      | 5          | 1.350       | 1.175        | 0.247         | 0.210      | 4                 | 1.460       | 4                 | 1.316       | 4                 | 1.388        | 0.1           | 0.074      |
| ATP synthase subunit beta, mitochondrial precursor [Mus musculus]                                 | 31980648  | 2           | 56.3     | 5.34     | 32.70     | 89     | 16         | 1.060       | 1.030        | 0.043         | 0.042      | 49                | 1.112       | 49                | 1.664       | 49                | 1.388        | 0.4           | 0.281      |
| V-type proton ATPase 116 kDa subunit a isoform 2 [Mus musculus]                                   | 83627707  | 2           | 98.1     | 6.64     | 2.10      | 3      | 2          | 0.657       | 0.828        | 0.243         | 0.293      | 1                 | 1.578       | 1                 | 1.191       | 1                 | 1.385        | 0.3           | 0.198      |
| beta-catenin [Mus musculus]                                                                       | 6671684   | 2           | 85.4     | 5.86     | 2.30      | 6      | 2          | 1.347       | 1.173        | 0.245         | 0.209      | 1                 | 1.508       | 1                 | 1.261       | 1                 | 1.385        | 0.2           | 0.126      |
| transportin-3 [Mus musculus]                                                                      | 54312056  | 2           | 104.1    | 5.57     | 1.30      | 2      | 1          | 1.263       | 1.132        | 0.186         | 0.165      | 1                 | 1.063       | 1                 | 1.705       | 1                 | 1.384        | 0.5           | 0.328      |
| fatty acyl-CoA reductase 1 [Mus musculus]                                                         | 74096448  | 2           | 59.4     | 9.19     | 10.49     | 24     | 5          | 1.191       | 1.095        | 0.135         | 0.123      | 4                 | 1.093       | 4                 | 1.673       | 4                 | 1.383        | 0.4           | 0.296      |
| aspartyl/asparanyl beta-hydroxylase isoform 1 [Mus musculus]                                      | 125628659 | 2           | 83.0     | 5.08     | 10.12     | 11     | 6          | 0.947       | 0.974        | 0.037         | 0.038      | 4                 | 1.680       | 4                 | 1.085       | 4                 | 1.383        | 0.4           | 0.304      |
| DNA repair protein REV1 [Mus musculus]                                                            | 40254551  | 2           | 137.3    | 8.54     | 0.56      | 4      | 1          | 1.065       | 1.032        | 0.046         | 0.044      | 2                 | 1.191       | 2                 | 1.574       | 2                 | 1.376        | 0.3           | 0.196      |
| polycomb protein Suz12 isoform 1 [Mus musculus]                                                   | 40353214  | 2           | 83.0     | 8.81     | 2.70      | 3      | 2          | 1.511       | 1.256        | 0.362         | 0.288      | 1                 | 1.512       | 1                 | 1.240       | 1                 | 1.376        | 0.2           | 0.140      |
| monocarboxylate transporter 1 [Mus musculus]                                                      | 6677995   | 2           | 53.2     | 7.47     | 8.92      | 4      | 3          | 0.689       |              |               |            |                   |             |                   |             |                   |              |               |            |

|                                                                                       |           |   |       |       |       |     |    |       |       |       |       |    |       |    |       |    |       |     |       |
|---------------------------------------------------------------------------------------|-----------|---|-------|-------|-------|-----|----|-------|-------|-------|-------|----|-------|----|-------|----|-------|-----|-------|
| serine/threonine-protein kinase SRPK2 [Mus musculus]                                  | 47059480  | 2 | 76.8  | 4.91  | 4.25  | 2   | 2  | 1.495 | 1.248 | 0.350 | 0.281 | 2  | 1.483 | 2  | 1.172 | 2  | 1.328 | 0.2 | 0.166 |
| 60S acidic ribosomal protein P2 [Mus musculus]                                        | 83745120  | 2 | 11.6  | 4.54  | 85.22 | 105 | 6  | 1.472 | 1.236 | 0.333 | 0.270 | 35 | 1.266 | 35 | 1.385 | 36 | 1.326 | 0.1 | 0.063 |
| ATP synthase subunit alpha, mitochondrial precursor [Mus musculus]                    | 6680748   | 2 | 59.7  | 9.19  | 26.94 | 76  | 15 | 0.759 | 0.880 | 0.170 | 0.193 | 51 | 1.218 | 51 | 1.431 | 51 | 1.325 | 0.2 | 0.114 |
| programmed cell death protein 2 [Mus musculus]                                        | 120407033 | 2 | 38.3  | 5.38  | 4.66  | 2   | 1  | 1.572 | 1.286 | 0.404 | 0.314 | 1  | 1.514 | 1  | 1.132 | 1  | 1.323 | 0.3 | 0.204 |
| U3 small nucleolar RNA-associated protein 14 homolog A [Mus musculus]                 | 51889716  | 2 | 87.2  | 9.20  | 6.26  | 12  | 4  | 1.428 | 1.214 | 0.303 | 0.249 | 7  | 1.387 | 7  | 1.258 | 7  | 1.323 | 0.1 | 0.069 |
| casein kinase I isoform delta isoform 2 [Mus musculus]                                | 20544147  | 2 | 46.8  | 9.64  | 4.40  | 2   | 2  | 1.406 | 1.203 | 0.287 | 0.239 | 1  | 1.619 | 1  | 1.023 | 1  | 1.321 | 0.4 | 0.319 |
| probable ATP-dependent RNA helicase DDX10 [Mus musculus]                              | 189491668 | 2 | 100.7 | 7.75  | 1.26  | 2   | 1  | 1.570 | 1.285 | 0.403 | 0.314 | 1  | 1.554 | 1  | 1.086 | 1  | 1.320 | 0.3 | 0.251 |
| 60 kDa heat shock protein, mitochondrial [Mus musculus]                               | 183396771 | 2 | 60.9  | 6.18  | 15.71 | 12  | 6  | 1.291 | 1.146 | 0.206 | 0.180 | 5  | 1.207 | 6  | 1.432 | 6  | 1.319 | 0.2 | 0.121 |
| cytochrome c oxidase subunit 4 isoform 1, mitochondrial precursor [Mus musculus]      | 6753498   | 2 | 19.5  | 9.23  | 10.65 | 2   | 1  | 1.182 | 1.091 | 0.118 | 0.118 | 1  | 1.366 | 1  | 1.269 | 1  | 1.317 | 0.1 | 0.052 |
| hypothetical protein LOC74847 [Mus musculus]                                          | 197116351 | 2 | 47.4  | 5.96  | 1.38  | 11  | 4  | 1.263 | 1.132 | 0.186 | 0.164 | 5  | 1.401 | 5  | 1.233 | 5  | 1.317 | 0.1 | 0.090 |
| PREDICTED: similar to optic atrophy 1 (autosomal dominant) [Mus musculus]             | 149267809 | 2 | 95.7  | 6.76  | 5.94  | 12  | 1  | 1.131 | 1.065 | 0.092 | 0.087 | 4  | 1.292 | 4  | 1.336 | 4  | 1.314 | 0.0 | 0.024 |
| kinectin [Mus musculus]                                                               | 144922638 | 2 | 152.4 | 5.90  | 24.94 | 70  | 30 | 0.879 | 0.939 | 0.086 | 0.091 | 40 | 1.235 | 40 | 1.383 | 41 | 1.309 | 0.1 | 0.080 |
| PREDICTED: hypothetical protein [Mus musculus]                                        | 149263967 | 2 | 24.9  | 6.42  | 4.11  | 2   | 1  | 0.958 | 0.979 | 0.030 | 0.030 | 1  | 1.138 | 1  | 1.480 | 1  | 1.309 | 0.2 | 0.185 |
| transducin beta-like protein 3 [Mus musculus]                                         | 30102935  | 2 | 88.2  | 6.81  | 3.87  | 6   | 3  | 1.347 | 1.174 | 0.246 | 0.209 | 5  | 1.164 | 5  | 1.451 | 5  | 1.308 | 0.2 | 0.155 |
| chromodomain-helicase-DNA-binding protein 1-like [Mus musculus]                       | 13386044  | 2 | 101.4 | 6.64  | 1.67  | 2   | 1  | 1.459 | 1.230 | 0.325 | 0.264 | 1  | 1.538 | 1  | 1.076 | 1  | 1.307 | 0.3 | 0.250 |
| hypothetical protein LOC69612 [Mus musculus]                                          | 31981558  | 2 | 54.1  | 6.79  | 3.09  | 2   | 1  | 1.426 | 1.213 | 0.301 | 0.248 | 1  | 1.542 | 1  | 1.069 | 1  | 1.305 | 0.3 | 0.256 |
| nucleolar protein 6 [Mus musculus]                                                    | 118026904 | 2 | 129.1 | 6.79  | 3.04  | 5   | 3  | 1.354 | 1.177 | 0.251 | 0.213 | 3  | 1.239 | 3  | 1.371 | 3  | 1.305 | 0.1 | 0.072 |
| PREDICTED: hypothetical protein [Mus musculus]                                        | 149251053 | 2 | 23.3  | 9.99  | 38.03 | 25  | 8  | 0.812 | 0.906 | 0.133 | 0.147 | 14 | 1.248 | 13 | 1.360 | 14 | 1.304 | 0.1 | 0.061 |
| hypothetical protein LOC72722 [Mus musculus]                                          | 139948818 | 2 | 55.0  | 8.95  | 18.64 | 14  | 6  | 1.647 | 1.323 | 0.457 | 0.346 | 4  | 1.081 | 4  | 1.527 | 4  | 1.304 | 0.3 | 0.242 |
| exosome complex exonuclease RRP41 [Mus musculus]                                      | 29611663  | 2 | 26.2  | 6.15  | 22.45 | 11  | 4  | 1.577 | 1.288 | 0.408 | 0.317 | 6  | 1.576 | 6  | 1.030 | 6  | 1.303 | 0.4 | 0.296 |
| mRNA turnover protein 4 homolog [Mus musculus]                                        | 37537520  | 2 | 27.4  | 8.28  | 36.55 | 17  | 10 | 1.588 | 1.294 | 0.416 | 0.321 | 8  | 1.548 | 8  | 1.056 | 8  | 1.302 | 0.3 | 0.267 |
| A-kinase anchor protein 8 [Mus musculus]                                              | 31560394  | 2 | 76.2  | 5.14  | 1.60  | 4   | 2  | 0.855 | 0.927 | 0.103 | 0.111 | 2  | 1.369 | 2  | 1.233 | 2  | 1.301 | 0.1 | 0.074 |
| PREDICTED: hypothetical protein [Mus musculus]                                        | 149253631 | 2 | 11.4  | 9.74  | 18.45 | 2   | 1  | 1.235 | 1.118 | 0.166 | 0.149 | 1  | 1.127 | 1  | 1.473 | 1  | 1.300 | 0.2 | 0.188 |
| vam6/Vps39-like protein isoform 2 [Mus musculus]                                      | 30578384  | 2 | 100.6 | 7.12  | 1.37  | 2   | 1  | 1.547 | 1.274 | 0.387 | 0.304 | 1  | 1.497 | 1  | 1.100 | 1  | 1.298 | 0.3 | 0.217 |
| PREDICTED: similar to fibrillarin isoform 1 [Mus musculus]                            | 149251501 | 2 | 34.3  | 10.24 | 37.92 | 75  | 12 | 1.198 | 1.099 | 0.140 | 0.127 | 41 | 1.281 | 41 | 1.310 | 41 | 1.296 | 0.0 | 0.016 |
| trinuclotide repeat-containing gene 6B protein isoform 2 [Mus musculus]               | 159110982 | 2 | 187.9 | 6.81  | 1.86  | 3   | 2  | 1.294 | 1.147 | 0.208 | 0.181 | 2  | 1.425 | 2  | 1.162 | 2  | 1.294 | 0.2 | 0.144 |
| exportin-5 [Mus musculus]                                                             | 24429570  | 2 | 136.9 | 5.82  | 6.64  | 10  | 4  | 1.253 | 1.127 | 0.179 | 0.159 | 4  | 0.981 | 3  | 1.606 | 4  | 1.293 | 0.4 | 0.341 |
| stress-70 protein, mitochondrial [Mus musculus]                                       | 162461907 | 2 | 73.4  | 6.07  | 28.28 | 89  | 18 | 1.011 | 1.006 | 0.008 | 0.008 | 57 | 1.254 | 57 | 1.325 | 57 | 1.290 | 0.1 | 0.039 |
| coiled-coil domain-containing protein 50 isoform 2 [Mus musculus]                     | 71043970  | 2 | 33.7  | 7.11  | 4.48  | 5   | 2  | 1.047 | 1.024 | 0.034 | 0.032 | 2  | 1.302 | 2  | 1.271 | 2  | 1.287 | 0.0 | 0.017 |
| ubiquitin-conjugating enzyme E2 Q1 [Mus musculus]                                     | 170172548 | 2 | 46.1  | 5.10  | 1.90  | 1   | 1  | 1.576 | 1.288 | 0.407 | 0.316 | 1  | 1.000 | 1  | 1.573 | 1  | 1.286 | 0.4 | 0.315 |
| 39S ribosomal protein L13, mitochondrial [Mus musculus]                               | 21312936  | 2 | 20.7  | 9.35  | 13.48 | 4   | 2  | 1.336 | 1.168 | 0.237 | 0.203 | 2  | 1.535 | 2  | 1.037 | 2  | 1.286 | 0.4 | 0.274 |
| mitochondrial inner membrane protein [Mus musculus]                                   | 70608131  | 2 | 83.8  | 6.61  | 15.98 | 25  | 11 | 1.298 | 1.149 | 0.211 | 0.183 | 15 | 1.207 | 15 | 1.362 | 15 | 1.284 | 0.1 | 0.086 |
| coatomer subunit beta [Mus musculus]                                                  | 15426055  | 2 | 107.0 | 6.00  | 19.20 | 41  | 13 | 1.311 | 1.155 | 0.220 | 0.190 | 19 | 1.088 | 20 | 1.477 | 20 | 1.282 | 0.3 | 0.215 |
| alpha-soluble NSF attachment protein [Mus musculus]                                   | 13385392  | 2 | 33.2  | 5.45  | 5.08  | 1   | 1  | 0.711 | 0.856 | 0.204 | 0.139 | 1  | 1.131 | 1  | 1.433 | 1  | 1.282 | 0.2 | 0.166 |
| thyroid hormone receptor-associated protein 3 [Mus musculus]                          | 68533246  | 2 | 108.1 | 10.17 | 2.31  | 2   | 2  | 1.308 | 1.154 | 0.218 | 0.229 | 2  | 1.314 | 2  | 1.250 | 2  | 1.282 | 0.0 | 0.035 |
| PREDICTED: hypothetical protein [Mus musculus]                                        | 82994972  | 2 | 22.2  | 10.11 | 8.42  | 9   | 3  | 1.222 | 1.111 | 0.157 | 0.141 | 1  | 1.395 | 1  | 1.165 | 1  | 1.280 | 0.2 | 0.127 |
| ephrin type-A receptor 2 precursor [Mus musculus]                                     | 32484983  | 2 | 108.8 | 6.23  | 2.76  | 4   | 2  | 0.727 | 0.863 | 0.193 | 0.224 | 3  | 1.458 | 3  | 1.275 | 3  | 1.275 | 0.3 | 0.203 |
| cytochrome P450 20A1 [Mus musculus]                                                   | 74271886  | 2 | 52.1  | 6.95  | 8.44  | 6   | 3  | 1.050 | 1.025 | 0.036 | 0.035 | 3  | 1.039 | 3  | 1.508 | 3  | 1.274 | 0.3 | 0.260 |
| PREDICTED: similar to fibrous sheath-interacting protein 2 [Mus musculus]             | 149249474 | 2 | 725.4 | 6.29  | 0.43  | 15  | 5  | 0.731 | 0.866 | 0.190 | 0.216 | 6  | 1.057 | 6  | 1.488 | 6  | 1.273 | 0.3 | 0.239 |
| AP-1 complex subunit gamma-1 [Mus musculus]                                           | 56744242  | 2 | 92.7  | 6.80  | 3.03  | 4   | 2  | 1.514 | 1.257 | 0.364 | 0.289 | 1  | 1.185 | 1  | 1.352 | 1  | 1.270 | 0.1 | 0.095 |
| PREDICTED: similar to EF-hand Ca2+ binding protein p22 [Mus musculus]                 | 149249669 | 2 | 21.4  | 5.10  | 5.64  | 4   | 1  | 1.093 | 1.046 | 0.066 | 0.063 | 3  | 1.147 | 3  | 1.395 | 3  | 1.270 | 0.2 | 0.136 |
| steroid regulatory element-binding protein cleavage-activating protein [Mus musculus] | 156938291 | 2 | 139.5 | 7.08  | 0.94  | 1   | 1  | 1.229 | 1.115 | 0.162 | 0.145 | 1  | 1.121 | 1  | 1.416 | 1  | 1.269 | 0.2 | 0.165 |
| protein VAC14 homolog [Mus musculus]                                                  | 31542488  | 2 | 88.0  | 6.13  | 4.86  | 22  | 3  | 1.261 | 1.130 | 0.184 | 0.161 | 13 | 1.253 | 13 | 1.281 | 13 | 1.267 | 0.0 | 0.015 |
| PREDICTED: similar to GTP-binding protein (smg p21B) [Mus musculus]                   | 149261508 | 2 | 20.8  | 5.78  | 25.54 | 6   | 1  | 1.042 | 1.021 | 0.030 | 0.029 | 1  | 1.224 | 1  | 1.305 | 1  | 1.264 | 0.1 | 0.045 |
| neuropilin-2 isoform 6 precursor [Mus musculus]                                       | 116686144 | 2 | 101.4 | 5.81  | 1.11  | 1   | 4  | 0.759 | 0.879 | 0.171 | 0.194 | 1  | 0.979 | 1  | 1.550 | 1  | 1.264 | 0.4 | 0.319 |
| 28S ribosomal protein S22, mitochondrial [Mus musculus]                               | 13384904  | 2 | 41.2  | 8.56  | 9.19  | 4   | 3  | 0.992 | 0.996 | 0.006 | 0.006 | 3  | 1.464 | 3  | 1.064 | 3  | 1.264 | 0.3 | 0.224 |
| U4/U6 small nuclear ribonucleoprotein Prp4 [Mus musculus]                             | 55925589  | 2 | 58.3  | 7.28  | 14.40 | 13  | 6  | 1.592 | 1.246 | 0.348 | 0.279 | 7  | 1.546 | 7  | 1.567 | 7  | 1.263 | 0.4 | 0.317 |
| exosome complex exonuclease MTR3 [Mus musculus]                                       | 30794378  | 2 | 28.4  | 6.11  | 14.65 | 4   | 2  | 1.469 | 1.234 | 0.332 | 0.269 | 1  | 1.176 | 1  | 1.347 | 1  | 1.261 | 0.1 | 0.096 |
| PREDICTED: similar to leucine rich repeat containing 47 [Mus musculus]                | 149253441 | 2 | 63.6  | 8.35  | 10.52 | 7   | 4  | 1.467 | 1.233 | 0.330 | 0.268 | 4  | 1.320 | 4  | 1.203 | 4  | 1.261 | 0.1 | 0.066 |
| mannosyl-oligosaccharide 1,2-alpha-mannosidase IB [Mus musculus]                      | 6754620   | 2 | 72.8  | 8.28  | 2.65  | 2   | 1  | 1.294 | 1.147 | 0.208 | 0.181 | 1  | 1.196 | 1  | 1.324 | 1  | 1.260 | 0.1 | 0.072 |
| T-complex protein 1 subunit beta [Mus musculus]                                       | 126521835 | 2 | 57.4  | 6.40  | 30.65 | 39  | 14 | 1.309 | 1.155 | 0.219 | 0.199 | 21 | 1.449 | 22 | 1.069 | 22 | 1.259 | 0.3 | 0.213 |
| amine and glutamate-rich protein 1 [Mus musculus]                                     | 134152669 | 2 | 32.9  | 10.36 | 2.21  | 4   | 1  | 1.389 | 1.194 | 0.275 | 0.230 | 2  | 1.038 | 2  | 1.478 | 2  | 1.258 | 0.3 | 0.247 |
| ADP-ribosylation factor-like protein 8B [Mus musculus]                                | 13385518  | 2 | 21.5  | 8.43  | 22.04 | 4   | 3  | 0.883 | 0.941 | 0.083 | 0.088 | 1  | 1.491 | 1  | 1.025 | 1  | 1.258 | 0.3 | 0.262 |
| lactadherin isoform 2 [Mus musculus]                                                  | 113865977 | 2 | 47.1  | 7.05  | 23.24 | 19  | 9  | 0.999 | 1.000 | 0.001 | 0.001 | 13 | 0.963 | 13 | 1.551 | 13 | 1.257 | 0.4 | 0.331 |
| T-complex protein 1 subunit delta [Mus musculus]                                      | 6753322   | 2 | 58.0  | 8.02  | 12.43 | 48  | 7  | 1.150 | 1.075 | 0.106 | 0.099 | 27 | 1.281 | 27 | 1.232 | 27 | 1.257 | 0.0 | 0.027 |
| protein diaphanous homolog 3 [Mus musculus]                                           | 9789931   | 2 | 133.6 | 7.61  | 5.81  | 14  | 6  | 1.545 | 1.273 | 0.386 | 0.303 | 9  | 1.189 | 9  | 1.324 | 9  | 1.257 | 0.1 | 0.076 |
| ATP synthase subunit b, mitochondrial precursor [Mus musculus]                        | 78214312  | 2 | 28.9  | 9.06  | 6.25  | 3   | 2  | 0.817 | 0.909 | 0.219 | 0.142 | 2  | 1.098 | 2  | 1.414 | 2  | 1.256 | 0.2 | 0.178 |
| ran-binding protein 10 [Mus musculus]                                                 | 40804757  | 2 | 70.0  | 6.68  | 2.16  | 2   | 1  | 1.574 | 1.287 | 0.406 | 0.315 | 1  | 1.334 | 1  | 1.174 | 1  | 1.254 | 0.1 | 0.090 |
| survival of motor neuron-related-splicing factor 30 [Mus musculus]                    | 27369569  | 2 | 26.7  | 7.82  | 2.52  | 1   | 1  | 0.782 | 0.891 | 0.154 | 0.173 | 1  | 1.383 | 1  | 1.123 | 1  | 1.253 | 0.2 | 0.146 |
| multidrug resistance protein 1 [Mus musculus]                                         | 6755046   | 2 | 140.9 | 8.34  | 2.90  | 6   | 4  | 0.947 | 0.974 | 0.037 | 0.038 | 3  | 1.486 | 3  | 1.015 | 3  | 1.251 | 0.3 | 0.266 |
| short-chain specific acyl-CoA dehydrogenase, mitochondrial precursor [Mus musculus]   | 31982522  | 2 | 44.9  | 8.47  | 10.68 | 7   | 4  | 1.187 | 1.093 | 0.132 | 0.121 | 5  | 1.484 | 5  | 1.484 | 5  | 1.249 | 0.3 | 0.265 |
| probable ATP-dependent RNA helicase DDX27 [Mus musculus]                              | 124249330 | 2 | 85.9  | 9.25  | 2.63  | 3   | 2  | 1.479 | 1.239 | 0.338 | 0.273 | 2  | 1.357 | 2  | 1.136 | 2  | 1.246 | 0.2 | 0.125 |
| mediator of RNA polymerase II transcription subunit 8 isoform 2 [Mus musculus]        | 29366816  | 2 | 25.9  | 6.90  | 5.13  | 2   | 1  | 1.560 | 1.280 | 0.396 | 0.309 | 1  | 1.242 | 1  | 1.251 | 1  | 1.246 | 0.0 | 0.005 |
| PREDICTED: hypothetical protein [Mus musculus]                                        | 149257810 | 2 | 29.9  | 10.56 | 35.34 | 122 | 14 | 1.444 | 1.222 | 0.314 | 0.257 | 47 | 1.451 | 47 | 1.038 | 47 | 1.244 | 0.3 | 0.235 |
| nucleolar protein 16 [Mus musculus]                                                   | 30519925  | 2 | 21.1  | 9.91  | 15.17 | 13  | 3  | 1.174 | 1.087 | 0.123 | 0.113 | 6  | 1.252 | 6  | 1.234 | 6  | 1.243 | 0.  |       |

|                                                                                                                             |           |     |       |       |       |     |    |       |       |       |       |     |       |     |       |     |       |     |       |
|-----------------------------------------------------------------------------------------------------------------------------|-----------|-----|-------|-------|-------|-----|----|-------|-------|-------|-------|-----|-------|-----|-------|-----|-------|-----|-------|
| leucine-rich repeat and WD repeat-containing protein 1 [Mus musculus]                                                       | 166851848 | 2   | 71.5  | 7.87  | 2.01  | 3   | 1  | 1.086 | 1.043 | 0.061 | 0.058 | 2   | 1.448 | 2   | 1.009 | 2   | 1.228 | 0.3 | 0.253 |
| intraflagellar transport protein 20 homolog [Mus musculus]                                                                  | 9506865   | 2   | 15.2  | 5.12  | 11.36 | 1   | 1  | 1.558 | 1.279 | 0.394 | 0.308 | 1   | 1.312 | 1   | 1.144 | 1   | 1.228 | 0.1 | 0.097 |
| SWI/SNF complex subunit SMARCC1 [Mus musculus]                                                                              | 112421097 | 2   | 122.8 | 5.73  | 12.59 | 24  | 12 | 1.604 | 1.302 | 0.427 | 0.328 | 6   | 1.390 | 6   | 1.066 | 6   | 1.228 | 0.2 | 0.186 |
| calcium-binding mitochondrial carrier protein Aralar2 [Mus musculus]                                                        | 7657583   | 2   | 74.4  | 8.60  | 6.51  | 8   | 3  | 1.047 | 1.023 | 0.033 | 0.032 | 6   | 1.015 | 6   | 1.439 | 6   | 1.227 | 0.3 | 0.244 |
| ribosome biogenesis regulatory protein homolog [Mus musculus]                                                               | 227908779 | 2   | 41.5  | 10.77 | 7.40  | 5   | 3  | 0.739 | 0.870 | 0.184 | 0.212 | 4   | 1.129 | 4   | 1.139 | 4   | 1.224 | 0.1 | 0.110 |
| zinc finger MYM-type protein 2 [Mus musculus]                                                                               | 37959742  | 2   | 154.5 | 6.37  | 1.31  | 2   | 2  | 1.346 | 1.173 | 0.245 | 0.209 | 2   | 1.331 | 2   | 1.117 | 2   | 1.224 | 0.2 | 0.124 |
| small protein rich in amine and glycine [Mus musculus]                                                                      | 31981251  | 2   | 23.8  | 12.26 | 5.80  | 3   | 1  | 1.335 | 1.168 | 0.237 | 0.203 | 2   | 1.240 | 2   | 1.207 | 2   | 1.224 | 0.0 | 0.019 |
| ATP-dependent RNA helicase DDX51 [Mus musculus]                                                                             | 40538825  | 2   | 70.3  | 9.47  | 7.20  | 5   | 3  | 1.361 | 1.180 | 0.255 | 0.216 | 3   | 1.392 | 3   | 1.055 | 3   | 1.223 | 0.2 | 0.195 |
| PREDICTED: similar to splicing factor, arginine/serine-rich 1 (splicing factor 2, alternate splicing factor) [Mus musculus] | 149262253 | 2   | 27.7  | 10.36 | 8.06  | 2   | 2  | 1.497 | 1.248 | 0.351 | 0.281 | 2   | 1.177 | 2   | 1.270 | 2   | 1.223 | 0.1 | 0.054 |
| cytosolic Fe-S cluster assembly factor NUBP2 [Mus musculus]                                                                 | 6754908   | 2   | 29.5  | 6.52  | 3.27  | 1   | 1  | 1.189 | 1.095 | 0.134 | 0.122 | 1   | 1.205 | 1   | 1.240 | 1   | 1.222 | 0.0 | 0.020 |
| PREDICTED: similar to H+ ATP synthase [Mus musculus]                                                                        | 149262632 | 2   | 14.2  | 10.01 | 5.15  | 4   | 1  | 0.807 | 0.904 | 0.136 | 0.151 | 3   | 1.155 | 3   | 1.286 | 3   | 1.221 | 0.1 | 0.076 |
| nucleolar GTP-binding protein 1 [Mus musculus]                                                                              | 31560110  | 2   | 74.1  | 9.52  | 0.95  | 2   | 1  | 1.101 | 1.051 | 0.071 | 0.068 | 1   | 1.228 | 1   | 1.209 | 1   | 1.218 | 0.0 | 0.011 |
| la-related protein 4 isoform 2 [Mus musculus]                                                                               | 124358932 | 2   | 79.6  | 6.51  | 8.36  | 9   | 4  | 1.200 | 1.100 | 0.142 | 0.129 | 4   | 1.418 | 4   | 1.016 | 4   | 1.217 | 0.3 | 0.233 |
| telomere-associated protein RIF1 [Mus musculus]                                                                             | 146231944 | 2   | 267.0 | 5.60  | 3.71  | 13  | 8  | 0.882 | 0.941 | 0.083 | 0.089 | 8   | 0.937 | 8   | 1.496 | 8   | 1.217 | 0.4 | 0.325 |
| MK167 FHA domain-interacting nucleolar phosphoprotein [Mus musculus]                                                        | 224809384 | 2   | 36.2  | 10.24 | 5.36  | 1   | 1  | 0.781 | 0.891 | 0.155 | 0.173 | 1   | 0.961 | 1   | 1.470 | 1   | 1.216 | 0.4 | 0.296 |
| poly(A) binding protein, cytoplasmic 4 isoform 2 [Mus musculus]                                                             | 22507391  | 2   | 67.8  | 9.50  | 10.24 | 12  | 5  | 1.229 | 1.114 | 0.162 | 0.145 | 4   | 1.102 | 4   | 1.328 | 4   | 1.215 | 0.2 | 0.132 |
| signal recognition particle receptor subunit alpha [Mus musculus]                                                           | 27229036  | 2   | 69.6  | 8.95  | 17.14 | 43  | 12 | 0.631 | 0.816 | 0.261 | 0.320 | 28  | 0.981 | 28  | 1.449 | 28  | 1.215 | 0.3 | 0.273 |
| PREDICTED: hypothetical protein [Mus musculus]                                                                              | 149271689 | 2   | 23.1  | 4.09  | 3.48  | 1   | 1  | 1.014 | 1.007 | 0.010 | 0.010 | 1   | 1.169 | 1   | 1.261 | 1   | 1.215 | 0.1 | 0.054 |
| HEAT repeat-containing protein 3 [Mus musculus]                                                                             | 40789301  | 2   | 74.3  | 5.01  | 7.22  | 10  | 5  | 0.802 | 0.901 | 0.140 | 0.155 | 7   | 1.171 | 7   | 1.258 | 7   | 1.214 | 0.1 | 0.051 |
| serine/arginine repetitive matrix protein 2 [Mus musculus]                                                                  | 126157504 | 2   | 283.4 | 12.09 | 0.54  | 2   | 1  | 1.452 | 1.226 | 0.319 | 0.260 | 1   | 1.265 | 1   | 1.160 | 1   | 1.213 | 0.1 | 0.061 |
| histone H2B type 1-H [Mus musculus]                                                                                         | 30061387  | 2   | 13.9  | 10.32 | 60.32 | 123 | 10 | 0.684 | 0.842 | 0.223 | 0.265 | 2   | 1.008 | 2   | 1.211 | 2   | 1.211 | 0.3 | 0.236 |
| PREDICTED: similar to HistH2b protein [Mus musculus]                                                                        | 149264032 | 2   | 13.9  | 10.32 | 60.32 | 123 | 10 | 0.684 | 0.842 | 0.223 | 0.265 | 2   | 1.413 | 2   | 1.008 | 2   | 1.211 | 0.3 | 0.236 |
| eukaryotic translation initiation factor 4 gamma 1 isoform b [Mus musculus]                                                 | 56699434  | 2   | 175.2 | 5.38  | 6.59  | 23  | 8  | 1.457 | 1.228 | 0.323 | 0.263 | 7   | 1.059 | 7   | 1.360 | 7   | 1.210 | 0.2 | 0.176 |
| ferritin heavy chain [Mus musculus]                                                                                         | 6753912   | 2   | 21.1  | 5.88  | 3.85  | 2   | 1  | 0.742 | 0.871 | 0.182 | 0.209 | 2   | 1.273 | 2   | 1.143 | 2   | 1.208 | 0.1 | 0.076 |
| SHC-transforming protein 1 isoform b [Mus musculus]                                                                         | 15778828  | 2   | 51.4  | 7.08  | 2.77  | 2   | 1  | 0.985 | 0.992 | 0.011 | 0.011 | 2   | 1.152 | 2   | 1.264 | 2   | 1.208 | 0.1 | 0.065 |
| T-complex protein 1 subunit alpha B [Mus musculus]                                                                          | 110625624 | 2   | 60.4  | 6.16  | 31.12 | 52  | 15 | 1.243 | 1.122 | 0.172 | 0.153 | 29  | 1.189 | 29  | 1.227 | 29  | 1.208 | 0.0 | 0.022 |
| dna) homolog subfamily 1 precursor [Mus musculus]                                                                           | 7106295   | 2   | 63.8  | 8.97  | 5.25  | 10  | 2  | 0.900 | 0.950 | 0.071 | 0.075 | 3   | 0.997 | 3   | 1.419 | 3   | 1.208 | 0.3 | 0.247 |
| putative ribosomal RNA methyltransferase NOP2 [Mus musculus]                                                                | 15896689  | 2   | 86.9  | 9.19  | 7.81  | 11  | 6  | 1.100 | 1.050 | 0.071 | 0.067 | 9   | 1.038 | 9   | 1.378 | 9   | 1.208 | 0.2 | 0.199 |
| plakophilin-4 isoform 2 [Mus musculus]                                                                                      | 147899467 | 2   | 126.7 | 8.95  | 1.57  | 3   | 2  | 1.021 | 1.011 | 0.015 | 0.015 | 1   | 1.239 | 1   | 1.176 | 1   | 1.207 | 0.0 | 0.037 |
| phosphatidylserine decarboxylase proenzyme [Mus musculus]                                                                   | 126722757 | 2   | 45.9  | 9.57  | 3.45  | 2   | 1  | 0.979 | 0.989 | 0.015 | 0.015 | 1   | 1.123 | 1   | 1.289 | 1   | 1.206 | 0.1 | 0.097 |
| PDS5, regulator of cohesion maintenance, homolog B [Mus musculus]                                                           | 6695886   | 2   | 164.3 | 8.50  | 15.98 | 44  | 22 | 1.008 | 1.004 | 0.006 | 0.006 | 23  | 1.067 | 23  | 1.344 | 23  | 1.206 | 0.2 | 0.163 |
| PREDICTED: similar to Probable ATP-dependent RNA helicase DDX46 (DEAD box protein 46) [M                                    | 149264152 | 2   | 110.3 | 7.39  | 4.81  | 12  | 5  | 1.281 | 1.141 | 0.199 | 0.174 | 7   | 1.087 | 7   | 1.324 | 7   | 1.206 | 0.2 | 0.139 |
| gap junction alpha-1 protein [Mus musculus]                                                                                 | 6753992   | 2   | 43.0  | 8.76  | 3.93  | 4   | 1  | 0.687 | 0.843 | 0.221 | 0.263 | 2   | 1.450 | 2   | 0.961 | 2   | 1.205 | 0.3 | 0.287 |
| serine/threonine-protein phosphatase 2A 65 kDa regulatory subunit A alpha isoform [Mus mus                                  | 8394027   | 2   | 65.3  | 5.11  | 13.75 | 14  | 7  | 1.329 | 1.165 | 0.233 | 0.200 | 9   | 0.956 | 9   | 1.453 | 9   | 1.205 | 0.4 | 0.292 |
| 60S acidic ribosomal protein P0 [Mus musculus]                                                                              | 6671569   | 2   | 34.2  | 6.25  | 42.59 | 144 | 11 | 1.243 | 1.121 | 0.172 | 0.153 | 90  | 1.234 | 91  | 1.174 | 91  | 1.204 | 0.0 | 0.035 |
| 3-keto-steroid reductase [Mus musculus]                                                                                     | 87162470  | 2   | 37.3  | 6.73  | 3.59  | 1   | 1  | 1.394 | 1.197 | 0.279 | 0.233 | 1   | 1.281 | 1   | 1.122 | 1   | 1.202 | 0.1 | 0.094 |
| 182 kDa tankyrase-1-binding protein [Mus musculus]                                                                          | 124486923 | 0.5 | 181.7 | 4.88  | 7.15  | 16  | 8  | 1.332 | 1.166 | 0.235 | 0.201 | 9   | 0.678 | 9   | 0.921 | 9   | 1.099 | 0.2 | 0.214 |
| tyrosine-protein kinase Sgk269 [Mus musculus]                                                                               | 157909795 | 0.5 | 191.0 | 6.87  | 4.09  | 12  | 6  | 1.415 | 1.208 | 0.294 | 0.243 | 7   | 0.703 | 7   | 0.892 | 7   | 0.798 | 0.1 | 0.167 |
| family with sequence similarity 48, member A [Mus musculus]                                                                 | 9910330   | 0.5 | 59.6  | 7.08  | 1.32  | 1   | 1  | 0.916 | 0.908 | 0.130 | 0.143 | 1   | 0.736 | 1   | 0.859 | 1   | 0.798 | 0.1 | 0.109 |
| U4/U6.U5 tri-snRNP-associated protein 1 [Mus musculus]                                                                      | 124244096 | 0.5 | 90.8  | 5.82  | 7.44  | 10  | 6  | 1.000 | 1.000 | 0.000 | 0.000 | 6   | 0.791 | 6   | 0.802 | 6   | 0.797 | 0.0 | 0.010 |
| protein ECT2 [Mus musculus]                                                                                                 | 6681261   | 0.5 | 83.6  | 8.59  | 2.85  | 3   | 2  | 0.724 | 0.862 | 0.195 | 0.226 | 2   | 0.797 | 2   | 0.795 | 2   | 0.796 | 0.0 | 0.002 |
| 40S ribosomal protein S7 [Mus musculus]                                                                                     | 6755376   | 0.5 | 22.1  | 10.10 | 34.54 | 51  | 7  | 0.900 | 0.950 | 0.071 | 0.075 | 22  | 0.736 | 22  | 0.796 | 22  | 0.796 | 0.1 | 0.107 |
| cAMP-dependent protein kinase type II-alpha regulatory subunit [Mus musculus]                                               | 22550094  | 0.5 | 45.6  | 4.93  | 4.23  | 2   | 2  | 1.076 | 1.038 | 0.054 | 0.052 | 1   | 0.785 | 1   | 0.801 | 1   | 0.793 | 0.0 | 0.014 |
| ctron Rho-interacting kinase [Mus musculus]                                                                                 | 124487319 | 0.5 | 235.2 | 6.57  | 1.12  | 3   | 2  | 0.996 | 0.998 | 0.003 | 0.003 | 2   | 0.737 | 2   | 0.846 | 2   | 0.792 | 0.1 | 0.097 |
| E1A binding protein p300 [Mus musculus]                                                                                     | 94421034  | 0.5 | 263.1 | 8.54  | 2.32  | 4   | 3  | 0.761 | 0.880 | 0.169 | 0.192 | 1   | 0.639 | 1   | 0.942 | 1   | 0.791 | 0.2 | 0.271 |
| TRIO and F-actin-binding protein isoform 5 [Mus musculus]                                                                   | 88501743  | 0.5 | 218.1 | 7.75  | 9.86  | 44  | 16 | 1.245 | 1.122 | 0.173 | 0.154 | 25  | 0.806 | 25  | 0.776 | 25  | 0.791 | 0.0 | 0.027 |
| tubulin beta-2A chain [Mus musculus]                                                                                        | 33859488  | 0.5 | 49.9  | 4.89  | 53.48 | 286 | 19 | 0.860 | 0.930 | 0.099 | 0.106 | 10  | 0.796 | 10  | 0.784 | 10  | 0.790 | 0.0 | 0.011 |
| DNA damage-binding protein 1 [Mus musculus]                                                                                 | 7657011   | 0.5 | 126.8 | 5.26  | 17.54 | 49  | 16 | 0.723 | 0.861 | 0.196 | 0.227 | 25  | 0.780 | 25  | 0.800 | 25  | 0.790 | 0.0 | 0.018 |
| guanine nucleotide-binding protein (G1)/G(S)/G(T) subunit beta-2 [Mus musculus]                                             | 13937391  | 0.5 | 37.3  | 6.00  | 12.35 | 20  | 4  | 0.603 | 0.802 | 0.281 | 0.350 | 13  | 0.979 | 13  | 0.601 | 13  | 0.790 | 0.3 | 0.338 |
| multidrug resistance-associated protein 1 [Mus musculus]                                                                    | 6678848   | 0.5 | 171.1 | 7.36  | 1.37  | 15  | 2  | 0.721 | 0.861 | 0.197 | 0.229 | 3   | 0.908 | 3   | 0.671 | 3   | 0.790 | 0.2 | 0.212 |
| spectrin beta chain, brain 1 [Mus musculus]                                                                                 | 117938332 | 0.5 | 274.1 | 5.58  | 36.94 | 272 | 78 | 1.414 | 1.207 | 0.293 | 0.242 | 141 | 0.641 | 141 | 0.936 | 142 | 0.788 | 0.2 | 0.265 |
| C2 domain-containing protein 2-like [Mus musculus]                                                                          | 88900515  | 0.5 | 76.3  | 7.21  | 6.09  | 9   | 3  | 0.681 | 0.840 | 0.226 | 0.269 | 3   | 0.827 | 3   | 0.749 | 3   | 0.788 | 0.1 | 0.071 |
| protein NEDD1 [Mus musculus]                                                                                                | 171543875 | 0.5 | 71.2  | 7.84  | 3.18  | 2   | 1  | 0.961 | 0.980 | 0.028 | 0.028 | 1   | 0.839 | 1   | 0.736 | 1   | 0.788 | 0.1 | 0.093 |
| alpha-parvin [Mus musculus]                                                                                                 | 31982526  | 0.5 | 42.3  | 5.95  | 1.61  | 1   | 1  | 0.692 | 0.846 | 0.218 | 0.257 | 1   | 0.653 | 1   | 0.919 | 1   | 0.786 | 0.2 | 0.240 |
| protein Shroom2 [Mus musculus]                                                                                              | 125347788 | 0.5 | 165.2 | 6.70  | 1.82  | 4   | 2  | 1.203 | 1.102 | 0.144 | 0.131 | 2   | 0.794 | 2   | 0.776 | 2   | 0.785 | 0.0 | 0.016 |
| rab11 family-interacting protein 5 isoform 2 [Mus musculus]                                                                 | 55743143  | 0.5 | 69.5  | 9.07  | 1.55  | 2   | 1  | 0.668 | 0.834 | 0.235 | 0.282 | 1   | 0.762 | 1   | 0.805 | 1   | 0.783 | 0.0 | 0.039 |
| serine/threonine-protein kinase 12 [Mus musculus]                                                                           | 51317394  | 0.5 | 39.4  | 9.44  | 3.48  | 1   | 1  | 1.015 | 1.008 | 0.011 | 0.011 | 1   | 0.903 | 1   | 0.662 | 1   | 0.783 | 0.2 | 0.218 |
| eukaryotic translation initiation factor 3 subunit K [Mus musculus]                                                         | 21312044  | 0.5 | 25.1  | 4.93  | 19.72 | 11  | 4  | 0.982 | 0.991 | 0.013 | 0.013 | 8   | 0.763 | 8   | 0.799 | 8   | 0.781 | 0.0 | 0.033 |
| eukaryotic translation initiation factor 3 subunit L [Mus musculus]                                                         | 51093840  | 0.5 | 66.6  | 6.44  | 31.56 | 74  | 18 | 0.749 | 0.875 | 0.177 | 0.203 | 48  | 0.633 | 49  | 0.927 | 49  | 0.780 | 0.2 | 0.266 |
| exosome complex exonuclease RRP46 [Mus musculus]                                                                            | 20070392  | 0.5 | 25.2  | 7.56  | 3.83  | 1   | 1  | 0.890 | 0.945 | 0.078 | 0.082 | 1   | 0.788 | 1   | 0.772 | 1   | 0.780 | 0.0 | 0.015 |
| dedicator of cytokinesis protein 1 [Mus musculus]                                                                           | 88853584  | 0.5 | 214.9 | 7.62  | 5.36  | 13  | 9  | 0.862 | 0.931 | 0.098 | 0.105 | 9   | 0.715 | 9   | 0.845 | 9   | 0.780 | 0.1 | 0.118 |
| activity-dependent neuroprotector homeobox protein [Mus musculus]                                                           | 90093349  | 0.5 | 124.2 | 6.86  | 2.89  | 4   | 3  | 0.937 | 0.969 | 0.044 | 0.046 | 3   | 0.780 | 3   | 0.778 | 3   | 0.779 | 0.0 | 0.002 |
| carnitine O-palmitoyltransferase 1, liver isoform [Mus musculus]                                                            | 162287142 | 0.5 | 88.2  | 8.62  | 2.98  | 5   | 2  | 0.988 | 0.994 | 0.009 | 0.009 | 3   | 0.757 | 3   | 0.800 | 3   | 0.778 | 0.0 | 0.039 |
| leucine zipper protein 1 [Mus musculus]                                                                                     | 119433663 | 0.5 | 119.2 | 7.99  | 30.62 | 90  | 28 | 0.906 | 0.953 | 0.067 | 0.070 | 52  | 0.901 | 52  | 0.656 | 52  | 0.778 | 0.2 | 0.223 |
| microtubule-actin cross-linking factor 1 [Mus musculus]                                                                     | 169234940 | 0.5 | 619.1 | 5.44  | 2.34  | 17  | 9  | 0.976 |       |       |       |     |       |     |       |     |       |     |       |

|                                                                                                |           |     |       |       |       |     |    |       |       |       |       |     |       |     |       |     |       |     |       |
|------------------------------------------------------------------------------------------------|-----------|-----|-------|-------|-------|-----|----|-------|-------|-------|-------|-----|-------|-----|-------|-----|-------|-----|-------|
| death-associated protein kinase 3 [Mus musculus]                                               | 6681133   | 0.5 | 51.4  | 8.70  | 14.51 | 8   | 6  | 0.967 | 0.983 | 0.024 | 0.024 | 7   | 0.750 | 7   | 0.778 | 7   | 0.764 | 0.0 | 0.026 |
| WD repeat-containing protein 82 [Mus musculus]                                                 | 148223079 | 0.5 | 35.1  | 7.69  | 15.34 | 6   | 4  | 0.983 | 0.992 | 0.012 | 0.012 | 4   | 0.738 | 4   | 0.790 | 4   | 0.764 | 0.0 | 0.048 |
| 3,2-trans-enoyl-CoA isomerase, mitochondrial precursor [Mus musculus]                          | 31981810  | 0.5 | 32.2  | 8.98  | 21.80 | 13  | 5  | 0.832 | 0.916 | 0.119 | 0.130 | 8   | 0.794 | 8   | 0.733 | 8   | 0.764 | 0.0 | 0.057 |
| tropomyosin alpha-4 chain [Mus musculus]                                                       | 47894398  | 0.5 | 28.5  | 4.68  | 62.90 | 196 | 24 | 1.244 | 1.122 | 0.172 | 0.154 | 107 | 0.889 | 107 | 0.638 | 108 | 0.764 | 0.2 | 0.233 |
| kinesin-like protein KIF3A [Mus musculus]                                                      | 34328138  | 0.5 | 80.1  | 6.54  | 1.71  | 2   | 1  | 0.996 | 0.998 | 0.003 | 0.003 | 2   | 0.801 | 2   | 0.725 | 2   | 0.763 | 0.1 | 0.071 |
| AP-3 complex subunit mu-2 [Mus musculus]                                                       | 170763483 | 0.5 | 46.9  | 7.56  | 3.59  | 4   | 2  | 0.721 | 0.860 | 0.198 | 0.230 | 2   | 0.604 | 2   | 0.916 | 2   | 0.760 | 0.2 | 0.291 |
| myosin-XVIIa [Mus musculus]                                                                    | 22094119  | 0.5 | 230.8 | 6.16  | 26.29 | 120 | 50 | 1.046 | 1.023 | 0.032 | 0.032 | 71  | 0.905 | 72  | 0.614 | 72  | 0.759 | 0.2 | 0.271 |
| serine/threonine-protein phosphatase 6 regulatory ankyrin repeat subunit C [Mus musculus]      | 27370168  | 0.5 | 115.0 | 6.54  | 1.49  | 2   | 1  | 0.774 | 0.887 | 0.160 | 0.180 | 1   | 0.768 | 1   | 0.751 | 1   | 0.759 | 0.0 | 0.016 |
| procollagen C-proteinase enhancer protein [Mus musculus]                                       | 125490382 | 0.5 | 50.1  | 8.41  | 4.49  | 4   | 2  | 1.078 | 1.039 | 0.055 | 0.053 | 3   | 0.656 | 3   | 0.862 | 3   | 0.759 | 0.1 | 0.192 |
| EH domain-binding protein 1 [Mus musculus]                                                     | 154240710 | 0.5 | 136.2 | 5.39  | 10.61 | 26  | 12 | 1.485 | 1.243 | 0.343 | 0.276 | 16  | 0.808 | 16  | 0.708 | 16  | 0.758 | 0.1 | 0.093 |
| filamin-C [Mus musculus]                                                                       | 124487139 | 0.5 | 290.9 | 5.95  | 11.92 | 253 | 31 | 0.951 | 0.976 | 0.035 | 0.035 | 18  | 0.740 | 18  | 0.775 | 18  | 0.757 | 0.0 | 0.033 |
| PREDICTED: hypothetical protein [Mus musculus]                                                 | 149257848 | 0.5 | 10.1  | 9.76  | 8.33  | 1   | 1  | 0.880 | 0.940 | 0.085 | 0.091 | 1   | 0.759 | 1   | 0.752 | 1   | 0.755 | 0.0 | 0.006 |
| ATP-binding cassette sub-family A member 13 [Mus musculus]                                     | 116292744 | 0.5 | 568.5 | 6.52  | 0.24  | 13  | 2  | 1.023 | 1.011 | 0.016 | 0.016 | 5   | 0.691 | 5   | 0.817 | 5   | 0.754 | 0.1 | 0.118 |
| AP-2 complex subunit alpha-1 isoform b [Mus musculus]                                          | 116256510 | 0.5 | 105.4 | 7.66  | 16.65 | 64  | 17 | 0.677 | 0.838 | 0.228 | 0.272 | 16  | 0.818 | 16  | 0.690 | 16  | 0.754 | 0.1 | 0.121 |
| SECIS-like 2 [Mus musculus]                                                                    | 226371698 | 0.5 | 94.1  | 6.39  | 2.96  | 3   | 2  | 1.129 | 1.065 | 0.091 | 0.086 | 2   | 0.815 | 2   | 0.693 | 2   | 0.754 | 0.1 | 0.114 |
| patatin-like phospholipase domain-containing protein 7 [Mus musculus]                          | 225007615 | 0.5 | 150.4 | 6.92  | 1.11  | 1   | 1  | 1.024 | 1.012 | 0.017 | 0.017 | 1   | 0.810 | 1   | 0.695 | 1   | 0.753 | 0.1 | 0.109 |
| coronin-1B [Mus musculus]                                                                      | 6753494   | 0.5 | 53.9  | 5.78  | 10.33 | 15  | 5  | 1.066 | 1.033 | 0.047 | 0.045 | 10  | 0.808 | 10  | 0.696 | 10  | 0.752 | 0.1 | 0.105 |
| probable ATP-dependent RNA helicase DHX40 [Mus musculus]                                       | 144926009 | 0.5 | 88.5  | 8.63  | 1.54  | 2   | 1  | 1.018 | 1.009 | 0.013 | 0.013 | 1   | 0.850 | 1   | 0.655 | 1   | 0.752 | 0.1 | 0.183 |
| paraspeckle component 1 [Mus musculus]                                                         | 225543409 | 0.5 | 58.7  | 6.67  | 1.34  | 1   | 1  | 1.166 | 1.083 | 0.117 | 0.108 | 1   | 0.676 | 1   | 0.828 | 1   | 0.752 | 0.1 | 0.143 |
| PREDICTED: triple functional domain (PTPRF interacting) [Mus musculus]                         | 149264663 | 0.5 | 347.7 | 6.35  | 1.80  | 11  | 5  | 0.947 | 0.973 | 0.038 | 0.039 | 6   | 0.741 | 6   | 0.753 | 6   | 0.747 | 0.0 | 0.011 |
| uveal autoantigen with coiled-coil domains and ankyrin repeats [Mus musculus]                  | 28077007  | 0.5 | 160.8 | 7.20  | 9.06  | 22  | 11 | 0.831 | 0.915 | 0.120 | 0.131 | 12  | 0.855 | 12  | 0.639 | 12  | 0.747 | 0.2 | 0.205 |
| 6-phosphofruktokinase, liver type [Mus musculus]                                               | 31560653  | 0.5 | 85.3  | 7.17  | 13.46 | 18  | 8  | 0.898 | 0.949 | 0.072 | 0.076 | 10  | 0.904 | 10  | 0.587 | 10  | 0.745 | 0.2 | 0.301 |
| KN motif and ankyrin repeat domain-containing protein 2 [Mus musculus]                         | 160333753 | 0.5 | 90.2  | 5.55  | 0.83  | 5   | 1  | 1.087 | 1.043 | 0.061 | 0.059 | 3   | 0.716 | 3   | 0.773 | 3   | 0.744 | 0.0 | 0.054 |
| CCR4-NOT transcription complex subunit 3 [Mus musculus]                                        | 21222717  | 0.5 | 81.9  | 6.20  | 4.66  | 5   | 3  | 1.096 | 1.048 | 0.068 | 0.065 | 3   | 0.615 | 3   | 0.871 | 3   | 0.743 | 0.2 | 0.244 |
| ankyrin repeat domain protein 17 isoform b [Mus musculus]                                      | 40549395  | 0.5 | 246.5 | 6.70  | 2.21  | 4   | 3  | 0.882 | 0.941 | 0.084 | 0.089 | 2   | 0.638 | 2   | 0.848 | 2   | 0.743 | 0.1 | 0.199 |
| protein SMG7 isoform 3 [Mus musculus]                                                          | 53828718  | 0.5 | 126.5 | 8.69  | 1.59  | 2   | 1  | 0.983 | 0.991 | 0.012 | 0.012 | 1   | 0.573 | 1   | 0.908 | 1   | 0.741 | 0.2 | 0.320 |
| polymerase delta-interacting protein 3 [Mus musculus]                                          | 30519969  | 0.5 | 46.1  | 10.05 | 23.33 | 21  | 8  | 1.191 | 1.095 | 0.135 | 0.123 | 10  | 0.824 | 10  | 0.654 | 11  | 0.739 | 0.1 | 0.163 |
| 80 kDa MCM3-associated protein [Mus musculus]                                                  | 109627648 | 0.5 | 217.2 | 6.61  | 1.67  | 3   | 2  | 1.045 | 1.023 | 0.032 | 0.031 | 2   | 0.752 | 2   | 0.721 | 2   | 0.737 | 0.0 | 0.030 |
| protein flightless-1 homolog [Mus musculus]                                                    | 11528490  | 0.5 | 144.7 | 6.06  | 20.14 | 79  | 24 | 0.894 | 0.947 | 0.075 | 0.079 | 50  | 0.836 | 50  | 0.631 | 50  | 0.734 | 0.1 | 0.197 |
| dna) homolog subfamily C member 3 precursor [Mus musculus]                                     | 31245263  | 0.5 | 57.4  | 5.85  | 18.65 | 21  | 8  | 0.693 | 0.846 | 0.217 | 0.257 | 7   | 0.657 | 7   | 0.808 | 7   | 0.732 | 0.1 | 0.146 |
| heat shock-related 70 kDa protein 2 [Mus musculus]                                             | 50345978  | 0.5 | 69.6  | 5.67  | 17.85 | 176 | 14 | 0.624 | 0.812 | 0.266 | 0.327 | 1   | 0.839 | 1   | 0.624 | 1   | 0.731 | 0.2 | 0.208 |
| electron transfer flavoprotein subunit alpha, mitochondrial precursor [Mus musculus]           | 227500281 | 0.5 | 35.0  | 8.38  | 15.32 | 8   | 3  | 1.604 | 0.802 | 0.280 | 0.350 | 5   | 0.757 | 5   | 0.704 | 5   | 0.730 | 0.0 | 0.052 |
| transcription factor 4 isoform b [Mus musculus]                                                | 145386522 | 0.5 | 71.1  | 7.01  | 1.35  | 1   | 1  | 0.507 | 1.253 | 0.358 | 0.286 | 1   | 0.746 | 1   | 0.714 | 1   | 0.730 | 0.0 | 0.032 |
| hypothetical protein LOC67267 [Mus musculus]                                                   | 13385560  | 0.5 | 16.3  | 9.19  | 11.76 | 2   | 1  | 0.711 | 0.855 | 0.204 | 0.239 | 1   | 0.839 | 1   | 0.618 | 1   | 0.729 | 0.2 | 0.214 |
| pericentriolar material 1 protein [Mus musculus]                                               | 170763496 | 0.5 | 228.7 | 5.01  | 5.14  | 17  | 9  | 0.890 | 0.945 | 0.078 | 0.082 | 12  | 0.750 | 12  | 0.707 | 12  | 0.728 | 0.0 | 0.042 |
| condensin-2 complex subunit H2 isoform b [Mus musculus]                                        | 153792292 | 0.5 | 68.0  | 4.81  | 5.51  | 4   | 2  | 0.938 | 0.969 | 0.044 | 0.045 | 3   | 0.665 | 3   | 0.786 | 3   | 0.725 | 0.1 | 0.118 |
| DNA-directed RNA polymerase II subunit RPB1 [Mus musculus]                                     | 6677795   | 0.5 | 213.3 | 7.43  | 1.66  | 4   | 2  | 0.610 | 0.805 | 0.276 | 0.343 | 2   | 0.604 | 2   | 0.846 | 2   | 0.725 | 0.2 | 0.236 |
| protein C20orf11 homolog [Mus musculus]                                                        | 58037443  | 0.5 | 26.8  | 10.97 | 2.63  | 1   | 1  | 0.798 | 0.899 | 0.143 | 0.159 | 1   | 0.739 | 1   | 0.711 | 1   | 0.725 | 0.0 | 0.028 |
| serine/threonine-protein kinase D1 [Mus musculus]                                              | 153945802 | 0.5 | 102.0 | 6.58  | 3.70  | 4   | 3  | 0.711 | 0.856 | 0.204 | 0.239 | 2   | 0.844 | 2   | 0.605 | 2   | 0.725 | 0.2 | 0.234 |
| protein phosphatase 1 regulatory subunit 12A [Mus musculus]                                    | 95772123  | 0.5 | 111.7 | 5.60  | 21.61 | 38  | 17 | 0.761 | 0.880 | 0.169 | 0.192 | 21  | 0.875 | 21  | 0.566 | 21  | 0.721 | 0.2 | 0.303 |
| pleckstrin homology domain-containing family G member 3 [Mus musculus]                         | 167621502 | 0.5 | 148.4 | 5.68  | 2.39  | 3   | 3  | 0.709 | 0.855 | 0.205 | 0.240 | 3   | 0.861 | 3   | 0.578 | 3   | 0.719 | 0.2 | 0.278 |
| dynactin subunit 2 [Mus musculus]                                                              | 28076935  | 0.5 | 44.1  | 5.26  | 9.45  | 7   | 3  | 0.753 | 0.877 | 0.175 | 0.199 | 2   | 0.875 | 2   | 0.562 | 2   | 0.719 | 0.2 | 0.308 |
| melanoma-associated antigen D1 [Mus musculus]                                                  | 9789935   | 0.5 | 85.6  | 7.50  | 4.52  | 4   | 3  | 0.792 | 0.896 | 0.147 | 0.164 | 3   | 0.628 | 3   | 0.808 | 3   | 0.718 | 0.1 | 0.178 |
| cytochrome b-c1 complex subunit 9 [Mus musculus]                                               | 37574048  | 0.5 | 7.4   | 9.19  | 26.56 | 2   | 1  | 1.011 | 1.005 | 0.008 | 0.008 | 1   | 0.637 | 1   | 0.796 | 1   | 0.716 | 0.1 | 0.157 |
| formin-like protein 3 [Mus musculus]                                                           | 38708163  | 0.5 | 117.1 | 6.67  | 8.46  | 20  | 9  | 0.656 | 0.828 | 0.243 | 0.279 | 7   | 0.740 | 7   | 0.686 | 7   | 0.713 | 0.0 | 0.054 |
| leucine-rich repeat flightless-interacting protein 1 isoform 1 [Mus musculus]                  | 162417949 | 0.5 | 79.2  | 4.82  | 23.18 | 41  | 14 | 0.855 | 0.927 | 0.103 | 0.111 | 19  | 0.730 | 19  | 0.697 | 19  | 0.713 | 0.0 | 0.032 |
| leucine-rich repeat and calponin homology domain-containing protein 3 precursor [Mus musculus] | 124486939 | 0.5 | 86.3  | 7.03  | 13.50 | 24  | 8  | 0.899 | 0.949 | 0.072 | 0.076 | 14  | 0.889 | 14  | 0.537 | 14  | 0.713 | 0.2 | 0.350 |
| interferon-stimulated gene 20 kDa protein [Mus musculus]                                       | 15805028  | 0.5 | 20.6  | 8.75  | 4.42  | 1   | 1  | 1.411 | 1.206 | 0.291 | 0.241 | 1   | 0.612 | 1   | 0.812 | 1   | 0.712 | 0.1 | 0.199 |
| cysteine-rich protein 2 [Mus musculus]                                                         | 13195646  | 0.5 | 22.7  | 8.63  | 5.77  | 1   | 1  | 0.967 | 0.983 | 0.023 | 0.024 | 1   | 0.635 | 1   | 0.789 | 1   | 0.712 | 0.1 | 0.153 |
| nck-associated protein 1 [Mus musculus]                                                        | 28395023  | 0.5 | 128.7 | 6.62  | 11.52 | 29  | 12 | 0.647 | 0.824 | 0.249 | 0.303 | 20  | 0.696 | 20  | 0.727 | 21  | 0.712 | 0.0 | 0.030 |
| eukaryotic peptide chain release factor GTP-binding subunit ERF3A isoform 2 [Mus musculus]     | 194018533 | 0.5 | 68.5  | 5.21  | 4.88  | 12  | 4  | 0.631 | 0.816 | 0.261 | 0.320 | 3   | 0.692 | 3   | 0.724 | 3   | 0.708 | 0.0 | 0.033 |
| rho GTPase-activating protein 21 isoform 2 [Mus musculus]                                      | 203097667 | 0.5 | 215.7 | 7.64  | 0.26  | 1   | 1  | 0.966 | 0.983 | 0.024 | 0.025 | 1   | 0.679 | 1   | 0.737 | 1   | 0.708 | 0.0 | 0.057 |
| lethal(2) ant larva protein homolog 2 [Mus musculus]                                           | 144922656 | 0.5 | 114.3 | 7.46  | 5.94  | 9   | 5  | 0.686 | 0.843 | 0.222 | 0.263 | 5   | 0.831 | 5   | 0.584 | 5   | 0.707 | 0.2 | 0.247 |
| vacuolar protein sorting-associated protein 13C [Mus musculus]                                 | 122114537 | 0.5 | 419.8 | 6.81  | 1.01  | 10  | 3  | 1.102 | 1.051 | 0.072 | 0.068 | 2   | 0.801 | 2   | 0.613 | 2   | 0.707 | 0.1 | 0.188 |
| dedicator of cytokinesis 7 [Mus musculus]                                                      | 78191789  | 0.5 | 237.9 | 6.79  | 16.40 | 98  | 30 | 1.017 | 1.009 | 0.012 | 0.012 | 48  | 0.762 | 48  | 0.646 | 48  | 0.704 | 0.1 | 0.117 |
| A-kinase anchor protein 2 isoform 2 [Mus musculus]                                             | 78711834  | 0.5 | 97.1  | 5.19  | 1.59  | 3   | 1  | 1.236 | 1.118 | 0.167 | 0.149 | 1   | 0.746 | 1   | 0.660 | 1   | 0.703 | 0.1 | 0.087 |
| PTB domain-containing enigma1 adapter protein 1 [Mus musculus]                                 | 164518895 | 0.5 | 34.4  | 7.90  | 6.58  | 4   | 2  | 0.779 | 0.890 | 0.156 | 0.175 | 2   | 0.643 | 2   | 0.760 | 2   | 0.701 | 0.1 | 0.119 |
| stress-induced-phosphoprotein 1 [Mus musculus]                                                 | 14389431  | 0.5 | 62.5  | 6.80  | 1.84  | 2   | 1  | 0.714 | 0.857 | 0.202 | 0.236 | 1   | 0.656 | 1   | 0.745 | 1   | 0.700 | 0.1 | 0.090 |
| proteasome subunit alpha type-6 [Mus musculus]                                                 | 6755198   | 0.5 | 27.4  | 6.86  | 14.23 | 8   | 3  | 0.681 | 0.841 | 0.225 | 0.268 | 5   | 0.795 | 5   | 0.604 | 5   | 0.699 | 0.1 | 0.193 |
| dynein light chain 2, cytoplasmic [Mus musculus]                                               | 18087731  | 0.5 | 10.3  | 7.37  | 20.22 | 4   | 2  | 0.802 | 0.901 | 0.140 | 0.155 | 3   | 0.635 | 3   | 0.759 | 3   | 0.697 | 0.1 | 0.126 |
| glucocorticoid receptor [Mus musculus]                                                         | 121247453 | 0.5 | 87.1  | 6.35  | 2.90  | 3   | 2  | 0.790 | 0.895 | 0.166 | 0.166 | 2   | 0.539 | 2   | 0.849 | 2   | 0.694 | 0.2 | 0.316 |
| protein phosphatase 1 regulatory subunit 12C [Mus musculus]                                    | 124249341 | 0.5 | 84.6  | 6.00  | 12.15 | 19  | 7  | 1.222 | 1.111 | 0.157 | 0.141 | 11  | 0.751 | 11  | 0.635 | 11  | 0.693 | 0.1 | 0.118 |
| phosphorylase b kinase regulatory subunit alpha, liver isoform [Mus musculus]                  | 27370156  | 0.5 | 138.4 | 6.37  | 1.46  | 2   | 1  | 1.212 | 1.106 | 0.150 | 0.136 | 1   | 0.642 | 1   | 0.742 | 1   | 0.692 | 0.1 | 0.102 |
| leucine-rich repeat flightless-interacting protein 1 isoform 3 [Mus musculus]                  | 162417952 | 0.5 | 48.9  | 5.57  | 14.25 | 10  | 6  | 0.696 | 0.848 | 0.215 | 0.253 | 1   | 0.815 | 1   | 0.568 | 1   | 0.691 | 0.2 | 0.253 |



|                                                                                                |           |     |       |      |       |     |    |       |       |       |       |    |       |    |       |    |       |     |       |
|------------------------------------------------------------------------------------------------|-----------|-----|-------|------|-------|-----|----|-------|-------|-------|-------|----|-------|----|-------|----|-------|-----|-------|
| cytoskeleton-associated protein 2-like [Mus musculus]                                          | 31712008  | 0.5 | 82.9  | 9.69 | 2.55  | 4   | 2  | 0.869 | 0.935 | 0.093 | 0.099 | 1  | 0.653 | 1  | 0.588 | 1  | 0.620 | 0.0 | 0.075 |
| amyotrophic lateral sclerosis 2 chromosomal reon candidate gene 4 protein homolog isoform 2 (I | 83715982  | 0.5 | 44.6  | 6.48 | 4.47  | 2   | 1  | 0.861 | 0.931 | 0.098 | 0.106 | 1  | 0.586 | 1  | 0.637 | 1  | 0.612 | 0.0 | 0.059 |
| tropomyosin beta chain [Mus musculus]                                                          | 11875203  | 0.5 | 32.8  | 4.70 | 70.07 | 349 | 34 | 0.771 | 0.885 | 0.162 | 0.183 | 78 | 0.706 | 78 | 0.504 | 78 | 0.605 | 0.1 | 0.236 |
| SLIT-ROBO Rho GTPase-activating protein 2 [Mus musculus]                                       | 157951723 | 0.5 | 120.7 | 6.64 | 20.92 | 41  | 16 | 0.912 | 0.956 | 0.062 | 0.065 | 24 | 0.596 | 24 | 0.592 | 24 | 0.594 | 0.0 | 0.004 |
| tight junction protein ZO-2 [Mus musculus]                                                     | 160333863 | 0.5 | 131.2 | 6.79 | 21.34 | 65  | 24 | 0.692 | 0.846 | 0.218 | 0.258 | 44 | 0.659 | 44 | 0.527 | 44 | 0.593 | 0.1 | 0.157 |
| nuclear factor 1 B-type isoform 3 [Mus musculus]                                               | 148747370 | 0.5 | 47.4  | 8.87 | 2.62  | 1   | 1  | 0.789 | 0.895 | 0.149 | 0.167 | 1  | 0.627 | 1  | 0.543 | 1  | 0.585 | 0.1 | 0.101 |
| PREDICTED: similar to ribosomal protein S17 [Mus musculus]                                     | 149261791 | 0.5 | 15.8  | 9.54 | 50.72 | 54  | 6  | 0.657 | 0.829 | 0.242 | 0.292 | 2  | 0.525 | 2  | 0.629 | 2  | 0.577 | 0.1 | 0.127 |
| keratin, type II cytoskeletal 2 oral [Mus musculus]                                            | 85701680  | 0.5 | 62.8  | 8.43 | 5.56  | 41  | 5  | 0.699 | 0.850 | 0.213 | 0.250 | 12 | 0.614 | 12 | 0.524 | 12 | 0.569 | 0.1 | 0.113 |
| collagen alpha-1(XII) chain [Mus musculus]                                                     | 111074529 | 0.5 | 333.1 | 5.80 | 17.45 | 136 | 45 | 0.725 | 0.862 | 0.195 | 0.226 | 84 | 0.589 | 84 | 0.531 | 85 | 0.560 | 0.0 | 0.073 |
| ras GTPase-activating-like protein IQGAP2 [Mus musculus]                                       | 118344444 | 0.5 | 180.4 | 5.64 | 3.75  | 28  | 6  | 0.674 | 0.837 | 0.231 | 0.276 | 6  | 0.489 | 6  | 0.612 | 6  | 0.551 | 0.1 | 0.157 |
| keratin, type II cytoskeletal 79 [Mus musculus]                                                | 22164776  | 0.5 | 57.5  | 7.69 | 5.27  | 33  | 4  | 0.651 | 0.826 | 0.247 | 0.299 | 10 | 0.446 | 10 | 0.650 | 10 | 0.548 | 0.1 | 0.263 |
| keratin Kb40 [Mus musculus]                                                                    | 145580629 | 0.5 | 112.2 | 7.97 | 2.62  | 41  | 4  | 0.615 | 0.807 | 0.272 | 0.337 | 18 | 0.494 | 18 | 0.583 | 18 | 0.538 | 0.1 | 0.117 |
| PREDICTED: similar to Snrpf protein [Mus musculus]                                             | 94372795  | 0.5 | 13.3  | 7.28 | 4.88  | 1   | 1  | 0.684 | 0.842 | 0.223 | 0.265 | 1  | 0.432 | 1  | 0.625 | 1  | 0.529 | 0.1 | 0.259 |
| keratin, type I cytoskeletal 42 [Mus musculus]                                                 | 154090941 | 0.5 | 50.1  | 5.16 | 6.19  | 6   | 4  | 0.832 | 0.916 | 0.119 | 0.130 | 1  | 0.579 | 1  | 0.463 | 1  | 0.521 | 0.1 | 0.158 |
| long-chain-fatty-acid-CoA ligase 4 isoform 2 [Mus musculus]                                    | 75992925  | 0.5 | 74.3  | 8.00 | 2.69  | 2   | 1  | 0.902 | 0.951 | 0.069 | 0.073 | 1  | 0.410 | 1  | 0.624 | 1  | 0.517 | 0.2 | 0.292 |
| probable RNA-binding protein 18 isoform 1 [Mus musculus]                                       | 13385930  | 0.5 | 21.6  | 9.44 | 6.84  | 7   | 2  | 0.807 | 0.903 | 0.136 | 0.151 | 1  | 0.466 | 1  | 0.563 | 1  | 0.515 | 0.1 | 0.133 |
| liprin-alpha-3 [Mus musculus]                                                                  | 161016786 | 0.5 | 133.3 | 5.64 | 0.84  | 2   | 1  | 1.563 | 1.282 | 0.398 | 0.311 | 1  | 0.407 | 1  | 0.574 | 1  | 0.490 | 0.1 | 0.241 |
| epidermal growth factor receptor pathway substrate 8 [Mus musculus]                            | 75677397  | 0.5 | 91.7  | 7.65 | 3.29  | 5   | 3  | 0.622 | 0.811 | 0.267 | 0.330 | 2  | 0.354 | 2  | 0.403 | 2  | 0.478 | 0.1 | 0.224 |
| acetyl-CoA carboxylase 1 [Mus musculus]                                                        | 125656173 | 0.5 | 265.1 | 6.39 | 4.78  | 12  | 8  | 0.974 | 0.987 | 0.018 | 0.019 | 6  | 0.411 | 6  | 0.388 | 6  | 0.400 | 0.0 | 0.040 |

| Gene name | Entrez Gene Name                                               | Accession | MW [kDa] | calc. pl | ΣCoverage | Σ# PSMs | Σ# Peptides | A5: 115/114 | A5: 115/114 Count | A5: 116/114 | A5: 116/114 Count | A5: 117/114 | A5: 117/114 Count | mean 117-116 | P value |
|-----------|----------------------------------------------------------------|-----------|----------|----------|-----------|---------|-------------|-------------|-------------------|-------------|-------------------|-------------|-------------------|--------------|---------|
| TMX4      | thioredoxin-related transmembrane protein 4                    | 112817607 | 37.1     | 4.37     | 9.25      | 9       | 2           | 1.117       | 5                 | 2.253       | 5                 | 2.175       | 5                 | 2.214        | 0.013   |
| IRGM      | immunity-related GTPase family, M                              | 6680351   | 46.5     | 8.28     | 3.91      | 2       | 1           | 0.956       | 1                 | 2.617       | 1                 | 1.796       | 1                 | 2.207        | 0.054   |
| PTPRK     | protein tyrosine phosphatase, receptor type, K                 | 6679561   | 164.1    | 5.95     | 0.82      | 2       | 1           | 0.880       | 1                 | 1.824       | 1                 | 2.025       | 1                 | 1.925        | 0.008   |
| PTRH2     | peptidyl-HRNA hydrolase 2                                      | 149363634 | 19.5     | 7.42     | 19.89     | 18      | 2           | 1.041       | 8                 | 1.571       | 8                 | 2.011       | 8                 | 1.791        | 0.054   |
| TIMM50    | translocase of inner mitochondrial membrane 50 homolog (S. c   | 22094989  | 39.8     | 8.13     | 4.82      | 6       | 1           | 1.139       | 3                 | 1.965       | 3                 | 1.578       | 3                 | 1.771        | 0.011   |
| MOGS      | mannosyl-oligosaccharide glucosidase                           | 31981106  | 91.8     | 9.00     | 3.00      | 4       | 2           | 0.905       | 2                 | 1.329       | 2                 | 1.660       | 2                 | 1.494        | 0.053   |
| CAPRN1    | cell cycle associated protein 1                                | 162329568 | 76.6     | 5.12     | 4.34      | 3       | 3           | 1.170       | 3                 | 1.828       | 3                 | 1.142       | 3                 | 1.485        | 0.045   |
| SLC16A1   | solute carrier family 16, member 1 (monocarboxylic acid transp | 6677995   | 53.2     | 7.47     | 8.92      | 4       | 3           | 0.689       | 3                 | 1.327       | 3                 | 1.415       | 3                 | 1.371        | 0.022   |
| ATP5C1    | ATP synthase, H+ transporting, mitochondrial F1 complex, carr  | 163838648 | 30.2     | 8.84     | 41.97     | 59      | 13          | 0.873       | 33                | 1.236       | 33                | 1.464       | 33                | 1.350        | 0.030   |
| AIFM1     | apoptosis-inducing factor, mitochondrion-associated, 1         | 6755004   | 66.7     | 9.17     | 5.72      | 5       | 2           | 1.002       | 2                 | 1.314       | 2                 | 1.377       | 2                 | 1.345        | 0.006   |
| KTN1      | kinesin 1 (kinesin receptor)                                   | 144922638 | 152.4    | 5.90     | 24.94     | 70      | 30          | 0.879       | 40                | 1.235       | 40                | 1.383       | 41                | 1.309        | 0.015   |
| HSPA9     | heat shock 70kDa protein 9 (mortalin)                          | 162461907 | 73.4     | 6.07     | 26.28     | 89      | 18          | 1.011       | 57                | 1.254       | 57                | 1.325       | 57                | 1.290        | 0.048   |
| Gm2835    | predicted gene 2835                                            | 149271689 | 23.1     | 4.09     | 3.48      | 1       | 1           | 1.014       | 1                 | 1.169       | 1                 | 1.261       | 1                 | 1.215        | 0.035   |
| HEATR3    | HEAT repeat containing 3                                       | 40789301  | 74.3     | 5.01     | 7.22      | 10      | 5           | 0.802       | 7                 | 1.171       | 7                 | 1.258       | 7                 | 1.214        | 0.016   |
| SHC1      | SHC (Src homology 2 domain containing) transforming protein    | 15778828  | 51.4     | 7.08     | 2.77      | 2       | 1           | 0.985       | 2                 | 1.152       | 2                 | 1.264       | 2                 | 1.208        | 0.035   |
| SART1     | squamous cell carcinoma antigen recognized by T cells          | 124244096 | 90.8     | 5.82     | 7.44      | 10      | 6           | 1.000       | 6                 | 0.791       | 6                 | 0.802       | 6                 | 0.797        | 0.037   |
| RPS7      | ribosomal protein S7                                           | 6755376   | 22.1     | 10.10    | 34.54     | 51      | 7           | 0.900       | 22                | 0.736       | 22                | 0.855       | 22                | 0.796        | 0.051   |
| PRKAR2A   | protein kinase, cAMP-dependent, regulatory, type II, alpha     | 22550094  | 45.6     | 4.93     | 4.23      | 2       | 2           | 1.076       | 1                 | 0.785       | 1                 | 0.801       | 1                 | 0.793        | 0.037   |
| ADNP      | activity-dependent neuroprotector homeobox                     | 90093349  | 124.2    | 6.86     | 2.89      | 4       | 3           | 0.937       | 3                 | 0.780       | 3                 | 0.778       | 3                 | 0.779        | 0.051   |
| VAT1      | vesicle amine transport protein 1 homolog (T. californica)     | 33859662  | 43.1     | 6.37     | 9.61      | 6       | 3           | 0.947       | 5                 | 0.797       | 5                 | 0.760       | 5                 | 0.778        | 0.047   |
| MED19     | mediator complex subunit 19                                    | 21313194  | 26.2     | 9.88     | 6.56      | 2       | 1           | 0.939       | 1                 | 0.750       | 1                 | 0.804       | 1                 | 0.777        | 0.022   |
| UBTF      | upstream binding transcription factor, RNA polymerase I        | 113205053 | 85.0     | 5.55     | 3.44      | 7       | 2           | 0.682       | 4                 | 0.745       | 4                 | 0.786       | 4                 | 0.765        | 0.004   |
| DAPK3     | death-associated protein kinase 3                              | 6681133   | 51.4     | 8.70     | 14.51     | 8       | 6           | 0.967       | 7                 | 0.750       | 7                 | 0.778       | 7                 | 0.764        | 0.024   |
| KIF3A     | kinesin family member 3A                                       | 34328138  | 80.1     | 6.54     | 1.71      | 2       | 1           | 0.996       | 2                 | 0.801       | 2                 | 0.725       | 2                 | 0.763        | 0.048   |
| MCM3AP    | minichromosome maintenance complex component 3 associat        | 109627648 | 217.2    | 6.61     | 1.67      | 3       | 2           | 1.045       | 2                 | 0.752       | 2                 | 0.721       | 2                 | 0.737        | 0.021   |
| ARHGAP21  | Rho GTPase activating protein 21                               | 203097667 | 215.7    | 7.64     | 0.26      | 1       | 1           | 0.966       | 1                 | 0.679       | 1                 | 0.737       | 1                 | 0.708        | 0.011   |
| LLGL1     | lethal giant larvae homolog 1 (Drosophila)                     | 6678696   | 112.3    | 6.48     | 2.61      | 2       | 2           | 1.094       | 2                 | 0.660       | 2                 | 0.714       | 2                 | 0.687        | 0.026   |
| FLNB      | filamin B, beta                                                | 145966915 | 276.4    | 5.69     | 22.46     | 245     | 54          | 1.211       | 72                | 0.657       | 72                | 0.714       | 72                | 0.686        | 0.054   |
| CSDA      | cold shock domain protein A                                    | 20806532  | 30.7     | 9.63     | 17.81     | 29      | 5           | 0.936       | 2                 | 0.655       | 2                 | 0.656       | 2                 | 0.655        | 0.003   |
| CKAP2L    | cytoskeleton associated protein 2-like                         | 31712008  | 82.9     | 9.69     | 2.55      | 4       | 2           | 0.869       | 1                 | 0.653       | 1                 | 0.588       | 1                 | 0.620        | 0.040   |
| RBM18     | RNA binding motif protein 18                                   | 13385930  | 21.6     | 9.44     | 6.84      | 7       | 2           | 0.807       | 1                 | 0.466       | 1                 | 0.563       | 1                 | 0.515        | 0.049   |
| ACACA     | acetyl-CoA carboxylase alpha                                   | 125656173 | 265.1    | 6.39     | 4.78      | 12      | 8           | 0.974       | 6                 | 0.411       | 6                 | 0.388       | 6                 | 0.400        | 0.050   |
| MCCC2     | methylcrotonoyl-CoA carboxylase 2 (beta)                       | 73622267  | 61.3     | 8.00     | 6.39      | 5       | 3           | 0.568       | 3                 | 0.180       | 3                 | 0.185       | 3                 | 0.183        | 0.053   |
